# Supplementary material for: C-KIT Expression Distinguishes Fetal from Postnatal Skeletal Progenitors
Source: PubMed Central journal article supplement — Stem Cell Reports. 2020 Mar 26;14(4):614–30. doi: 10.1016/j.stemcr.2020.03.001 (PMC7160391; doi:10.1016/j.stemcr.2020.03.001), 2020-03-26
Supplement: mmc2.pdf [file mmc2.pdf]

## C-KIT Expression Distinguishes Fetal from Postnatal Skeletal Progenitors

Di Demi He,<sup>1,3</sup> Xinyu Thomas Tang,<sup>1,3</sup> Wenjie Dong,<sup>1,3</sup> Guizhong Cui,<sup>1,3</sup> Guangdun Peng,<sup>1</sup> Xiujuan Yin,<sup>1</sup> Yujie Chen,<sup>2</sup> Naihe Jing,<sup>1</sup> and Bo O. Zhou<sup>1,\*</sup><sup>1</sup>State Key Laboratory of Cell Biology, Shanghai Institute of Biochemistry and Cell Biology, Chinese Academy of Sciences, University of Chinese Academy of Sciences, 320 Yueyang Road, Shanghai 200031, P. R. China<sup>2</sup>Bio-Med Big Data Center, CAS-Key Laboratory of Computational Biology, CAS-MPG Partner Institute for Computational Biology, Shanghai Institute of Nutrition and Health, Chinese Academy of Sciences, University of Chinese Academy of Sciences, 320 Yueyang Road, Shanghai 200031, P. R. China<sup>3</sup>Co-first author\*Correspondence: [bo.zhou@sibcb.ac.cn](mailto:bo.zhou@sibcb.ac.cn)<https://doi.org/10.1016/j.stemcr.2020.03.001>

## SUMMARY

Hematopoietic stem cells (HSCs) and skeletal stem cells (SSCs) cohabit in the bone marrow. KITL (C-KIT ligand) from LEPR<sup>+</sup> adult bone marrow stromal cells is pivotal for HSC maintenance. In contrast, it remains unclear whether KITL/C-KIT signaling also regulates SSCs. Here, we lineage traced C-KIT<sup>+</sup> cells and found that C-KIT was expressed by fetal, but not postnatal skeletal progenitors. Fetal C-KIT<sup>+</sup> cells gave rise to 20% of LEPR<sup>+</sup> stromal cells in adult bone marrow, forming nearly half of all osteoblasts. Disruption of mTOR signaling in fetal C-KIT<sup>+</sup> cells impaired bone formation. Notably, conditional deletion of *Kitl* from PRX1<sup>+</sup> fetal bone marrow stromal cells, but not LEPR<sup>+</sup> adult bone marrow stromal cells, significantly increased bone formation. Thus, our work identified C-KIT<sup>+</sup> skeletal progenitors as an important source of bones formed during development.

## INTRODUCTION

Skeletal stem cells (SSCs), also known as bone marrow mesenchymal stromal cells (BM-MSCs), reside in postnatal bone marrow and give rise to cartilage, bone, marrow adipocytes, and hematopoiesis-supportive stroma (Bianco et al., 2006; Bianco and Robey, 2015; Sacchetti et al., 2007). *In vitro*, SSCs are colony-forming units-fibroblasts (CFU-F) that are able to undergo osteogenic, adipogenic, and chondrogenic differentiation (Friedenstein et al., 1970; Pittenger et al., 1999). *In vivo*, most SSCs express PDGFR $\alpha$  (Morikawa et al., 2009), LEPR (Mizoguchi et al., 2014; Zhou et al., 2014a), PRX1 (Greenbaum et al., 2013), MX-1 (Park et al., 2012), *Nestin*-GFP transgene (Mendez-Ferrer et al., 2010), CXCL12 (Greenbaum et al., 2013), and SCF (Zhou et al., 2014a). For bones formed by endochondral ossification, fetal chondrocytes on the growing cartilage form SSC-enriching bone marrow stromal cells (Maes et al., 2010; Ono et al., 2014). Recent studies have also revealed the contribution of postnatal hypertrophic chondrocytes to SSCs and their lineages (Ono et al., 2014; Zhou et al., 2014b). Thus, chondrocytes are precursors of most SSCs in the bone marrow (Ono et al., 2014). Interestingly, in adult bone marrow, PTHRP<sup>+</sup> chondrocytes of the growth plate are multipotent progenitors that give rise to hypertrophic chondrocytes, trabecular bones, as well as SSCs (Mizuhashi et al., 2018). These studies raised a previously unrecognized question concerning the heterogeneity and/or hierarchy of chondrocytes during development and aging.

SSCs are a heterogeneous cell population. Sca-1 expression has been shown to enrich CFU-Fs, which are capable of trilineage differentiation *in vitro* (Morikawa et al.,

2009). GREMLIN-1 is expressed by a small fraction of SSCs that form osteoblasts but not marrow adipocytes (Worthley et al., 2015). Adiponectin is expressed by a subset of SSCs that form most marrow adipocytes but few osteoblasts (Zhou et al., 2017). GLI1-expressing SSCs form bones and are the primary source of myofibroblasts during bone marrow fibrosis (Shi et al., 2017). NG2<sup>+</sup> peri-arteriolar SSCs express higher levels of *Nestin*-GFP transgene and CXCL12 than peri-sinusoidal SSCs (Kunisaki et al., 2013). Neonatal CTSK<sup>+</sup> SSCs localize at the periosteal region and contribute to intramembranous bone formation (Debnath et al., 2018). An important yet largely unaddressed question concerns whether the self-renewal and differentiation of different SSC subpopulations are controlled by common or different mechanisms.

C-KIT is a well-known cell surface marker of many adult stem cells, such as hematopoietic stem cells (HSCs). KITL (C-KIT ligand)/C-KIT signaling maintains HSCs in the bone marrow (Ding et al., 2012). Whether C-KIT is expressed by SSCs was a topic with controversy (Deng, 2010; Deng et al., 2006; Hatzistergos et al., 2010). In this study, we assessed the expression of C-KIT in SSCs during development and investigated their potential contribution to SSC lineages, especially osteoblasts. Taking advantage of genetic lineage-tracing techniques, we identified an SSC subpopulation that was derived from fetal C-KIT<sup>+</sup> cells. These SSCs formed chondrocytes, osteoblasts, and adipocytes in adult bone marrow. Furthermore, by conditional knockout techniques, we found that the osteogenic activity of C-KIT<sup>+</sup> cells was intrinsically regulated by mammalian target of rapamycin (mTOR) and extrinsically regulated by KITL from fetal PRX1<sup>+</sup> stromal cells.

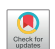

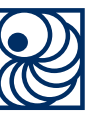

**A** *Kit<sup>MerCreMer</sup>; R26<sup>tdTomato</sup>; Col2.3-GFP*, 2-mon-old, Tamoxifen at P1-3, femur

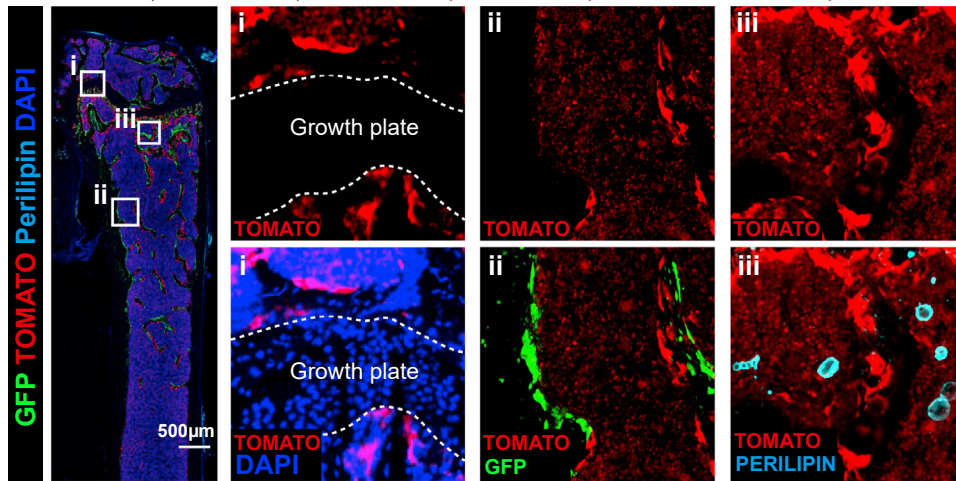

**B**

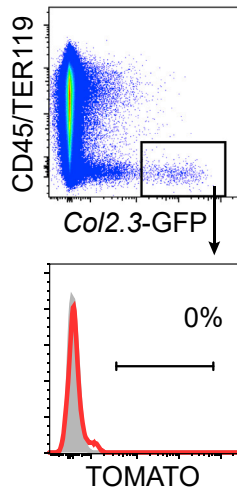

**C**

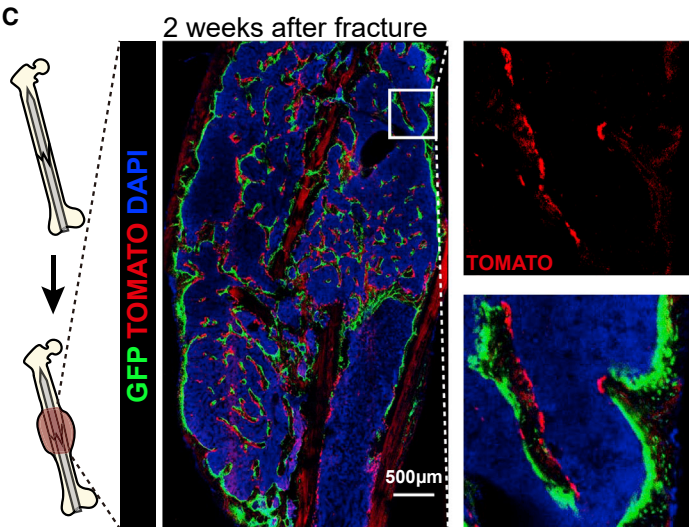

**D** *Kit<sup>MerCreMer</sup>; R26<sup>tdTomato</sup>*

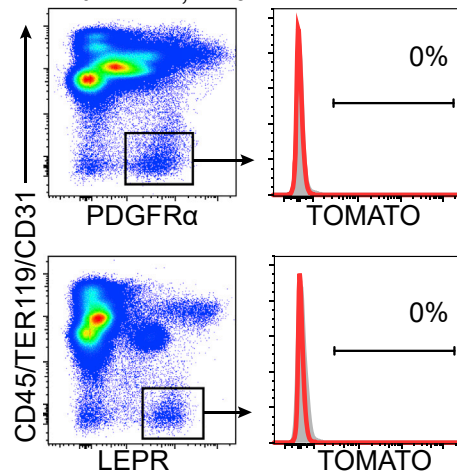

**E** wild-type

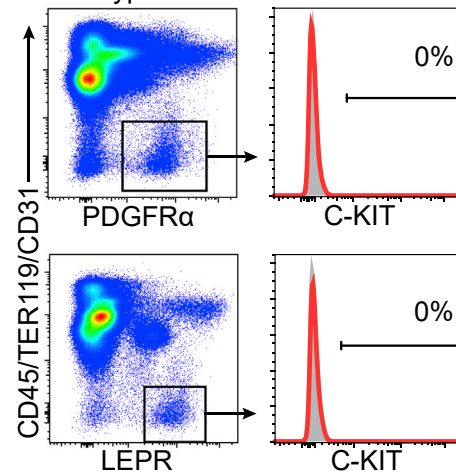

(legend on next page)

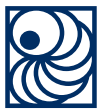

## RESULTS

### Fate-Mapping Postnatal C-KIT<sup>+</sup> Cells Did Not Label Any Osteoblasts or Bone Marrow Adipocytes

To address whether C-KIT is expressed by postnatal SSCs, we crossed the *Kit<sup>MerCreMer</sup>* knockin mice (van Berlo et al., 2014) successively with the *R26<sup>tdTomato</sup>* knockin mice (Madisen et al., 2010) and the *Col1a1\*2.3-GFP* (*Col2.3-GFP*) transgenic mice (Kalajzic et al., 2002) to generate the *Kit<sup>MerCreMer</sup>; R26<sup>tdTomato</sup>; Col2.3-GFP* mice. *Kit* promoter-driven Cre expression did not show any leakiness in the bone marrow without tamoxifen treatment (Figure S1A). By administering tamoxifen to these mice from postnatal days 1–3 (P1–P3) we were able to label and trace the fate of postnatal C-KIT<sup>+</sup> cells. In these mice, C-KIT<sup>+</sup> cells and their progeny were labeled by TOMATO; osteoblasts were labeled by *Col2.3-GFP*. Using confocal imaging of thin femur sections from these mice at 2 months of age, we did not detect TOMATO expression in any chondrocytes at the growth plate, *Col2.3-GFP*<sup>+</sup> osteoblasts lining the bone surface, or perilipin<sup>+</sup> adipocytes in the bone marrow (Figure 1A). The stromal cell-like cells lining the bone surface that displayed bright TOMATO fluorescence (Figure 1A) were actually tartrate-resistant acid phosphatase<sup>+</sup> (TRAP<sup>+</sup>) osteoclasts, a hematopoietic lineage (Figure S1B). Flow cytometric analysis of enzymatically dissociated bone shafts did not detect any *Col2.3-GFP*<sup>+</sup> osteoblasts that were TOMATO<sup>+</sup> in 2-month-old *Kit<sup>MerCreMer</sup>; R26<sup>tdTomato</sup>; Col2.3-GFP* mice (Figure 1B). These data suggested that postnatal C-KIT<sup>+</sup> cells do not generate any skeletal lineages in the bone marrow under homeostasis.

Next, we investigated if postnatal C-KIT<sup>+</sup> cells contribute to new osteoblast formation during fracture healing. Two-month-old tamoxifen-administered *Kit<sup>MerCreMer</sup>; R26<sup>tdTomato</sup>; Col2.3-GFP* mice were fractured on their right femurs (Figure 1C). At 2 weeks after the fracture, the bone callus was filled with newly formed cancellous bones (Fig-

ure 1C). We did not detect any *Col2.3-GFP*<sup>+</sup> osteoblasts that co-expressed TOMATO at the callus region (Figure 1C), suggesting that postnatal C-KIT<sup>+</sup> cells do not generate new osteoblasts during bone regeneration.

### Postnatal SSCs Did Not Express C-KIT

SSCs express PDGFR $\alpha$  (Morikawa et al., 2009) and LEPR (Mizoguchi et al., 2014; Zhou et al., 2014a). We found by flow cytometry that neither CD45<sup>-</sup>TER119<sup>-</sup>CD31<sup>-</sup>PDGFR $\alpha$ <sup>+</sup> nor CD45<sup>-</sup>TER119<sup>-</sup>CD31<sup>-</sup>LEPR<sup>+</sup> bone marrow stromal cells expressed TOMATO in 2-month-old *Kit<sup>MerCreMer</sup>; R26<sup>tdTomato</sup>* mice (Figure 1D). Consistent with this, C-KIT protein expression was not detected on CD45<sup>-</sup>TER119<sup>-</sup>CD31<sup>-</sup>PDGFR $\alpha$ <sup>+</sup> or CD45<sup>-</sup>TER119<sup>-</sup>CD31<sup>-</sup>LEPR<sup>+</sup> bone marrow stromal cells in 2-month-old wild-type mice (Figure 1E). Taken together, these data suggested that C-KIT is not expressed by postnatal SSCs.

### Fate-Mapping Fetal C-KIT<sup>+</sup> Cells Labeled Chondrocytes, Preosteoblasts, and Bone Marrow Stromal Cells at E16.5

Next, we investigated the expression of C-KIT in fetal bone marrow. *Kit<sup>MerCreMer</sup>; R26<sup>tdTomato</sup>* embryos that were treated with tamoxifen at embryonic day 12.5 (E12.5) displayed TOMATO fluorescence only in a few stromal cells in the growth cartilage at E13.5 (Figure S2A). We then treated *Kit<sup>MerCreMer</sup>; R26<sup>tdTomato</sup>; Col2.3-GFP* embryos at both E12.5 and 14.5 (E12.5/14.5). Using confocal imaging of femur sections at E16.5 we detected TOMATO expression in a subset of aggrecan<sup>+</sup> chondrocytes at the growth cartilage (Figure 2A, arrows). In the osteogenic perichondrium, many *Col2.3-GFP*<sup>+</sup> preosteoblasts that were close to the TOMATO<sup>+</sup> chondrocytes also expressed TOMATO (Figure 2A, arrow heads). Moreover, the nascent primary ossification center in the bone marrow was occupied by TOMATO<sup>+</sup> stromal cells (Figure 2A, asterisks).

### Figure 1. Lineage-Tracing of Neonatal C-KIT<sup>+</sup> Cells Did Not Label SSCs in the Bone Marrow

All *Kit<sup>MerCreMer</sup>; R26<sup>tdTomato</sup>; Col2.3-GFP* and *Kit<sup>MerCreMer</sup>; R26<sup>tdTomato</sup>* mice were tamoxifen treated at P1–3 and analyzed at 2 months of age. (A) Representative confocal images of femur sections from *Kit<sup>MerCreMer</sup>; R26<sup>tdTomato</sup>; Col2.3-GFP* mice. Osteoblasts were revealed by *Col2.3-GFP* fluorescence; adipocytes were revealed by anti-perilipin staining (n = 3 mice from three independent experiments). (B) Representative flow cytometry plots of enzymatically dissociated femoral bone shafts showed no TOMATO expression in any *Col2.3-GFP*<sup>+</sup> osteoblasts in *Kit<sup>MerCreMer</sup>; R26<sup>tdTomato</sup>; Col2.3-GFP* mice (n = 3 mice from three independent experiments). (C) Representative confocal images of the callus region of *Kit<sup>MerCreMer</sup>; R26<sup>tdTomato</sup>; Col2.3-GFP* mice at 2 weeks after femur fracture. Note that TOMATO was also expressed by hematopoietic cells in these mice but levels of TOMATO expression in stromal cells were ~10- to 100-fold higher than in hematopoietic cells. Therefore, short-exposure images showed mainly TOMATO fluorescence in stromal cells (n = 3 mice from three independent experiments). (D) Representative flow cytometry plots of enzymatically dissociated bone marrow cells showed that neither CD45<sup>-</sup>TER119<sup>-</sup>CD31<sup>-</sup>PDGFR $\alpha$ <sup>+</sup> nor CD45<sup>-</sup>TER119<sup>-</sup>CD31<sup>-</sup>LEPR<sup>+</sup> bone marrow stromal cells expressed TOMATO in *Kit<sup>MerCreMer</sup>; R26<sup>tdTomato</sup>* mice. Bone marrow stromal cells from wild-type mice were set as negative controls (gray) (n = 3 mice from three independent experiments). (E) Neither CD45<sup>-</sup>TER119<sup>-</sup>CD31<sup>-</sup>PDGFR $\alpha$ <sup>+</sup> nor CD45<sup>-</sup>TER119<sup>-</sup>CD31<sup>-</sup>LEPR<sup>+</sup> bone marrow stromal cells expressed C-KIT in 2-month-old wild-type mice. Isotype controls are shown in gray (n = 3 mice from three independent experiments).

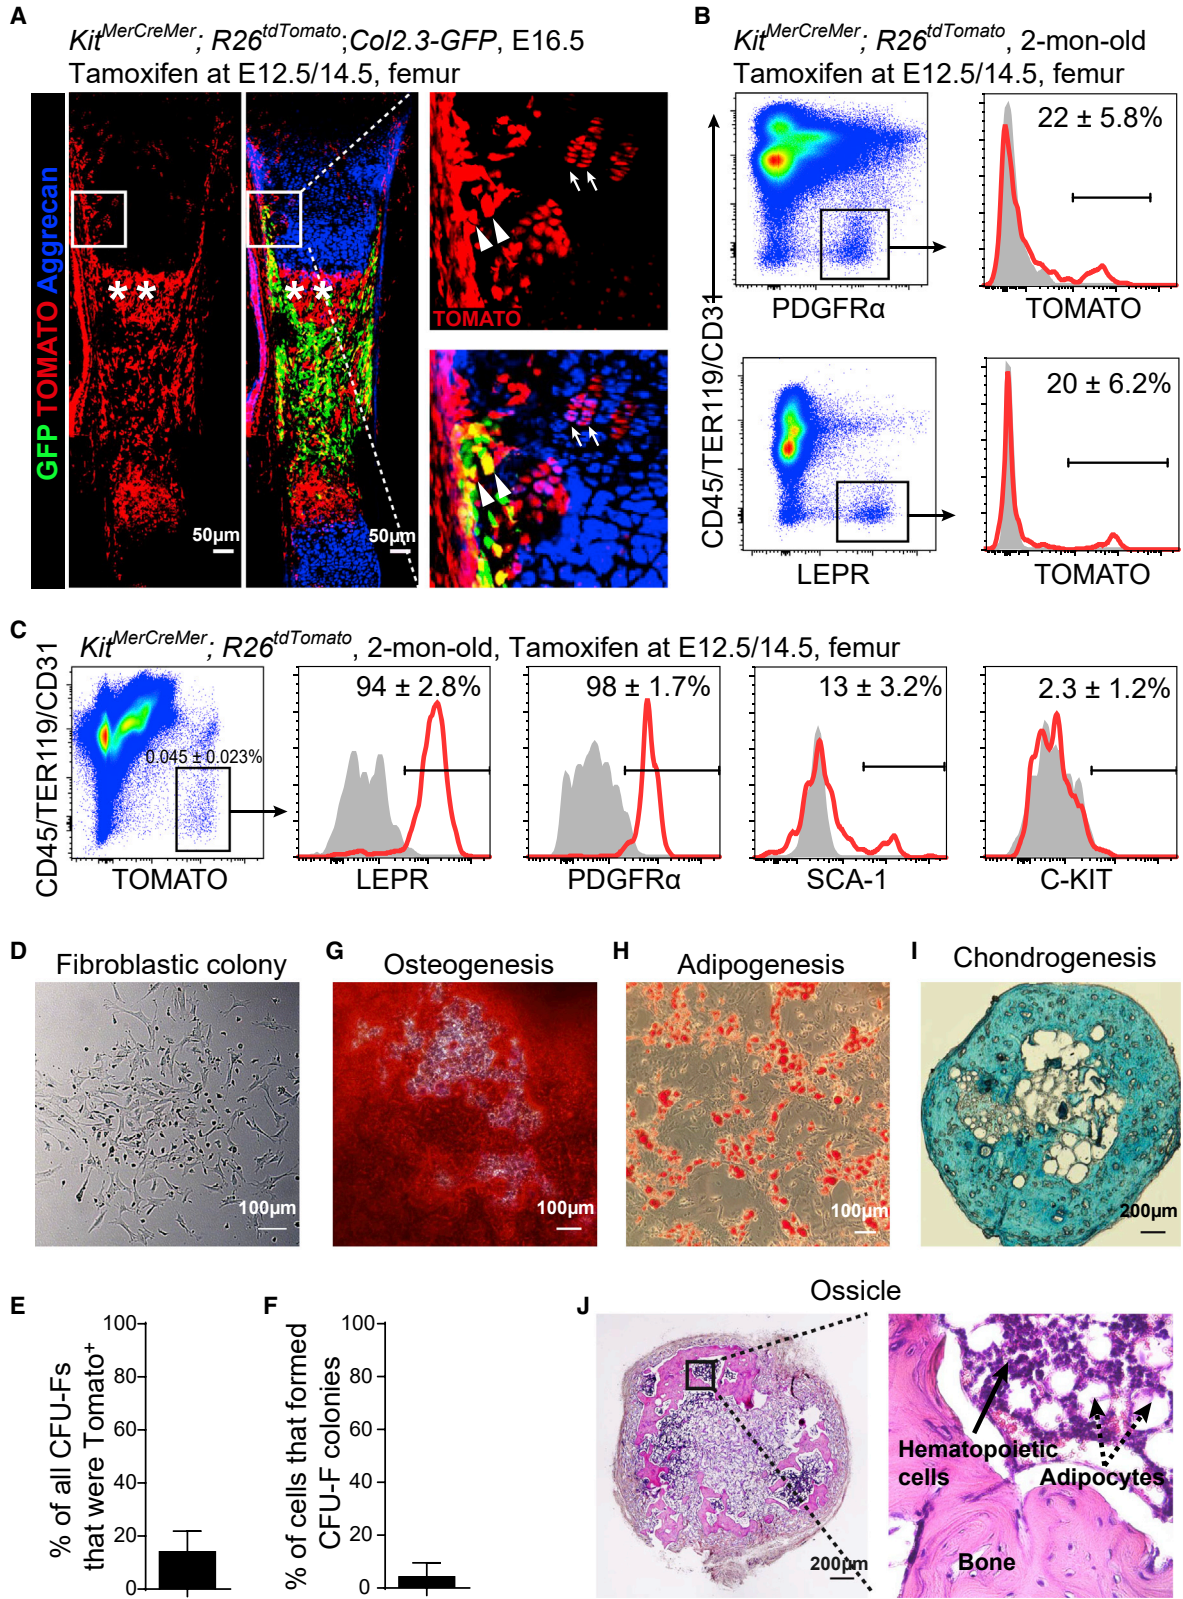

(legend on next page)

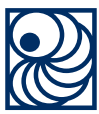

## C-KIT<sup>+</sup> Cell-Derived Bone Marrow Stromal Cells Contained SSCs

To address whether fetal C-KIT<sup>+</sup> cells generate SSCs in adult bone marrow, we analyzed 2-month-old *Kit<sup>MerCreMer</sup>; R26<sup>tdTomato</sup>* mice that had been treated with tamoxifen at E12.5/14.5. Flow cytometric analysis of enzymatically dissociated bone marrow cells from these mice showed that TOMATO was expressed by approximately 22% of CD45<sup>-</sup>TER119<sup>-</sup>CD31<sup>-</sup>PDGFR $\alpha$ <sup>+</sup> bone marrow stromal cells and approximately 20% of CD45<sup>-</sup>TER119<sup>-</sup>CD31<sup>-</sup>LEPR<sup>+</sup> bone marrow stromal cells (Figure 2B). The CD45<sup>-</sup>TER119<sup>-</sup>CD31<sup>-</sup>TOMATO<sup>+</sup> cells from *Kit<sup>MerCreMer</sup>; R26<sup>tdTomato</sup>* mice accounted for 0.045% of whole bone marrow cells (Figure 2C). They were uniformly positive for the expression of LEPR and PDGFR $\alpha$  but negative for the expression of C-KIT (Figure 2C). Approximately 13% of them expressed Sca-1 (Figure 2C).

SSCs are characterized as CFU-Fs that are capable of osteogenic, adipogenic, and chondrogenic differentiation *in vitro* (Friedenstein et al., 1970; Pittenger et al., 1999). To assess CFU-F activity we enzymatically dissociated bone marrow cells from *Kit<sup>MerCreMer</sup>; R26<sup>tdTomato</sup>* mice and added them to adherent cultures at clonal density (Figures 2D and S2B). Figure 2E shows that ~14% of all bone marrow CFU-Fs were TOMATO<sup>+</sup>. Figure 2F shows that ~4.2% of TOMATO<sup>+</sup>CD45<sup>-</sup>TER119<sup>-</sup>CD31<sup>-</sup> bone marrow stromal cells formed colonies. When the nutrient medium

was replaced with osteogenic, adipogenic, or chondrogenic medium, these colonies gradually formed alizarin red S<sup>+</sup> osteoblastic cells (Figure 2G), oil red O<sup>+</sup> adipocytes (Figure 2H), and alcian blue<sup>+</sup> chondrocytes (Figure 2I), respectively. Consistent with this, GFP fluorescence and anti-perilipin staining were robustly detected in the TOMATO<sup>+</sup> colonies from *Kit<sup>MerCreMer</sup>; R26<sup>tdTomato</sup>; Col2.3-GFP* mice when cultured in osteogenic and adipogenic differentiation media, respectively (Figures S2C and S2D).

Ossicle formation capacity distinguished SSCs from other bone marrow stromal cells and non-skeletal stromal cells (Chan et al., 2015; Sacchetti et al., 2007). We cultured ~500 TOMATO<sup>+</sup> bone marrow stromal cells from *Kit<sup>MerCreMer</sup>; R26<sup>tdTomato</sup>* mice, allowed them to form colonies, then expanded the colonies by one passage, implanted the cells into denatured collagen sponges, transplanted them subcutaneously, and assessed the development of bony ossicle 8 weeks later (Figure S2E). By hematoxylin and eosin staining, we observed bones, adipocytes, and hematopoietic cells within each ossicle (Figure 2J). Thus, the data above suggested that fate-mapping fetal C-KIT<sup>+</sup> cells traces a subset of SSCs in adult bone marrow.

## C-KIT<sup>+</sup> Cell-Derived Bone Marrow Stromal Cells Showed a Classical Transcriptomic Signature of SSCs

To further evaluate the SSC characteristics of fetal C-KIT<sup>+</sup> cell-derived bone marrow stromal cells, we performed

### Figure 2. Lineage-Tracing of Fetal C-KIT<sup>+</sup> Cells Labeled a Few Chondrocytes in Fetus and a Subpopulation of SSCs in Adult Bone Marrow

All *Kit<sup>MerCreMer</sup>; R26<sup>tdTomato</sup>; Col2.3-GFP* and *Kit<sup>MerCreMer</sup>; R26<sup>tdTomato</sup>* mice were tamoxifen treated at E12.5 and 14.5.

(A) Representative confocal images of femur sections from *Kit<sup>MerCreMer</sup>; R26<sup>tdTomato</sup>; Col2.3-GFP* mice at E16.5. Arrows indicated TOMATO<sup>+</sup> chondrocytes at the growth cartilage; arrowheads indicated TOMATO<sup>+</sup>Col2.3-GFP<sup>+</sup> preosteoblasts at the osteogenic perichondrium; asterisks indicated TOMATO<sup>+</sup> stromal cells in the nascent primary ossification center in the bone marrow (n = 3 mice from three independent experiments).

(B) Flow cytometric analysis showed that ~22% of CD45<sup>-</sup>TER119<sup>-</sup>CD31<sup>-</sup>PDGFR $\alpha$ <sup>+</sup> bone marrow stromal cells (upper plots) and ~20% of CD45<sup>-</sup>TER119<sup>-</sup>CD31<sup>-</sup>LEPR<sup>+</sup> bone marrow stromal cells (lower plots) were TOMATO<sup>+</sup> in 2-month-old *Kit<sup>MerCreMer</sup>; R26<sup>tdTomato</sup>* mice. The corresponding bone marrow stromal cells from wild-type mice were set as negative controls (gray) (n = 3 mice from three independent experiments).

(C) Representative flow cytometry plots of CD45<sup>-</sup>TER119<sup>-</sup>CD31<sup>-</sup>TOMATO<sup>+</sup> bone marrow stromal cells from 2-month-old *Kit<sup>MerCreMer</sup>; R26<sup>tdTomato</sup>* mice. Isotype controls are shown in gray (n = 4 mice from four independent experiments).

(D) Representative bright-field image of colonies formed by TOMATO<sup>+</sup> bone marrow stromal cells from 2-month-old *Kit<sup>MerCreMer</sup>; R26<sup>tdTomato</sup>* mice (n = 3 mice from three independent experiments).

(E) Percentage of all colonies from *Kit<sup>MerCreMer</sup>; R26<sup>tdTomato</sup>* mice that were TOMATO<sup>+</sup>. Macrophage colonies were excluded by staining with anti-CD45 antibody (n = 3 mice from three independent experiments).

(F) Percentage of TOMATO<sup>+</sup> bone marrow stromal cells from *Kit<sup>MerCreMer</sup>; R26<sup>tdTomato</sup>* mice that formed colonies in culture (n = 384 individual cells from 3 mice in three independent experiments).

(G–I) TOMATO<sup>+</sup> CFU-Fs from 2-month-old *Kit<sup>MerCreMer</sup>; R26<sup>tdTomato</sup>* mice were able to differentiate into alizarin red S<sup>+</sup> osteoblastic cells (G), oil red O<sup>+</sup> adipocytes (H), and alcian blue<sup>+</sup> chondrocytes (I). ~500 TOMATO<sup>+</sup> bone marrow stromal cells from *Kit<sup>MerCreMer</sup>; R26<sup>tdTomato</sup>* mice were cultured in colony-forming medium for 14 days. All colonies were digested and aliquots were cultured in osteogenic, adipogenic, and chondrogenic differentiation medium, respectively, before the staining. Adipogenic and osteogenic differentiation was performed in six-well plates while chondrogenic differentiation was performed as pellets in 15-mL tubes (n = 3 mice from three independent experiments).

(J) Cultured TOMATO<sup>+</sup> bone marrow stromal cells from 2-month-old *Kit<sup>MerCreMer</sup>; R26<sup>tdTomato</sup>* mice were able to form bone ossicles upon subcutaneous transplantation (n = 3 mice from three independent experiments).

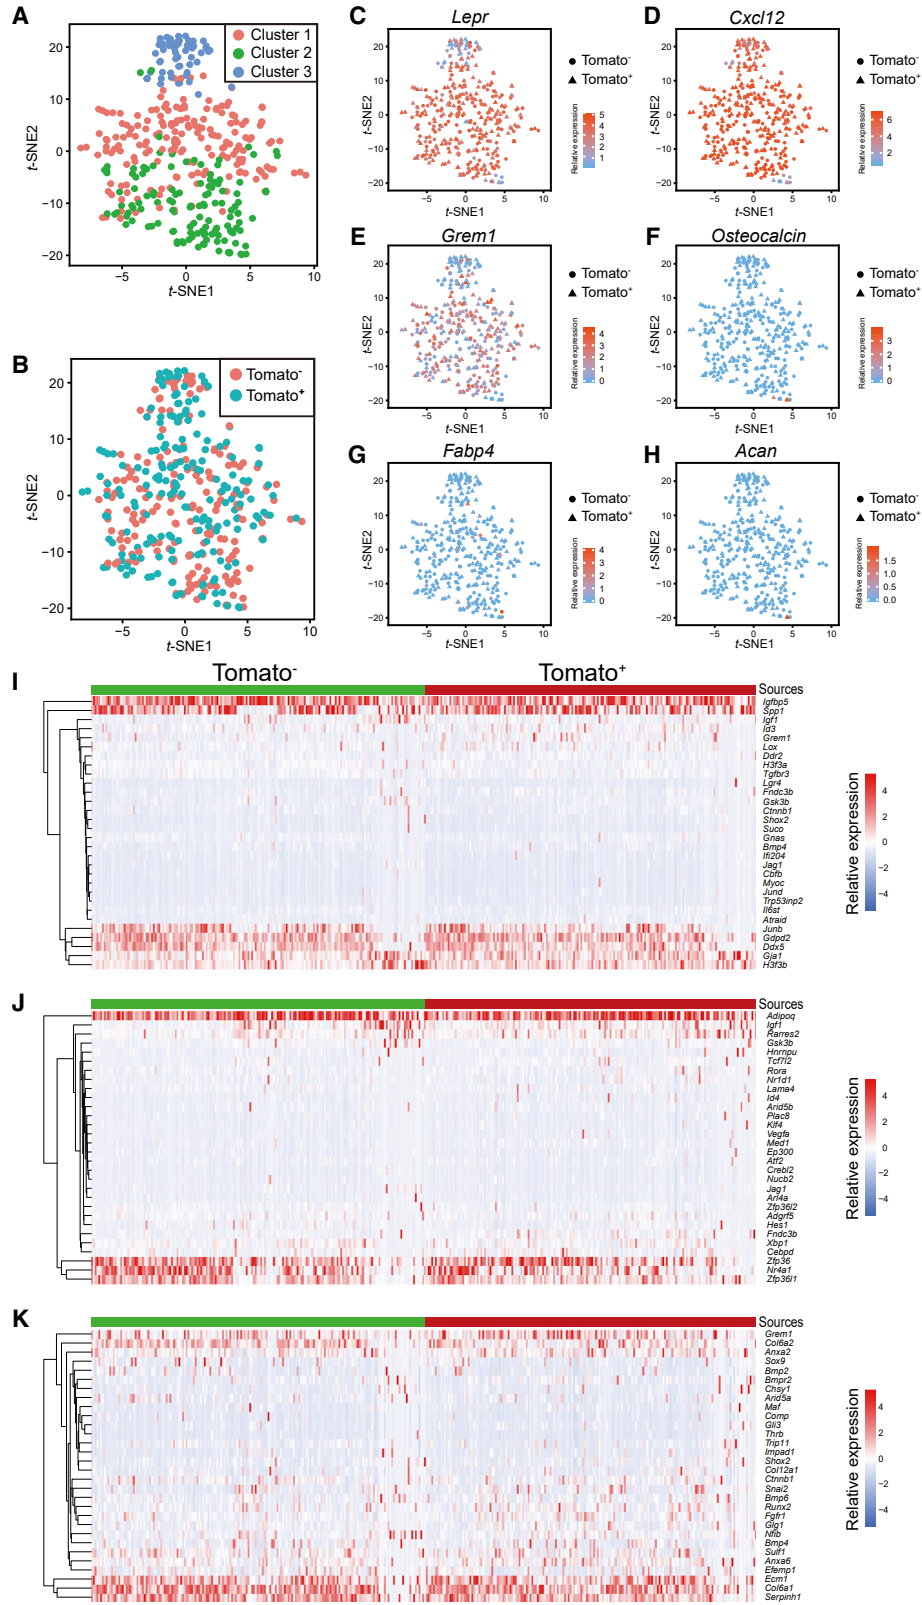

(legend on next page)



single-cell RNA sequencing (scRNA-seq) of CD45<sup>-</sup>TER119<sup>-</sup>CD31<sup>-</sup>PDGFR $\alpha$ <sup>+</sup> bone marrow stromal cells from 2-month-old *Kit*<sup>MerCreMer</sup>; *R26*<sup>tdTomato</sup> mice that had been treated with tamoxifen at E12.5/14.5. A total of 182 TOMATO<sup>+</sup> cells and 184 TOMATO<sup>-</sup> cells from three mice were subjected to Smart-seq2-based sequencing. Clustering analysis showed that the isolated cells grouped into three clusters (Figure 3A). Cluster 1 and 2 were positive for *Lepr* expression, whereas cluster 3 showed lower and heterogeneous *Lepr* expression (Figure 3C). TOMATO<sup>+</sup> and TOMATO<sup>-</sup> cells were distributed in all three clusters and were indistinguishable from each other (Figures 3A and 3B).

Both TOMATO<sup>+</sup> and TOMATO<sup>-</sup> stromal cells from *Kit*<sup>MerCreMer</sup>; *R26*<sup>tdTomato</sup> mice showed typical SSC transcriptional signatures. They were uniformly positive for *Cxcl12* expression (Figure 3D), mostly positive for *Lepr* expression (Figure 3C), heterogeneously positive for *Gremlin1* expression (Figure 3E), and uniformly negative for *Osteocalcin* (osteoblast marker, Figure 3F), *Fabp4* (adipocyte marker, Figure 3G), and *Acan* expression (chondrocyte marker, Figure 3H). Genes involved in osteogenic differentiation (Figure 3I), adipogenic differentiation (Figure 3J), and chondrogenic differentiation (Figure 3K) showed similar expression patterns in TOMATO<sup>+</sup> and TOMATO<sup>-</sup> stromal cells.

### C-KIT<sup>+</sup> Cell-Derived SSCs Formed Osteoblasts and Marrow Adipocytes throughout Adulthood

We fate-mapped the fetal C-KIT<sup>+</sup> cells to investigate how these cells contribute to skeletal development *in vivo*. *Kit*<sup>MerCreMer</sup>; *R26*<sup>tdTomato</sup>; *Col2.3-GFP* mice were treated with tamoxifen at E12.5/14.5 and euthanized at 2 months of age. We found that TOMATO<sup>+</sup> chondrocytes were sparsely distributed at the growth plate of the femur from these mice (Figure 4A). We also observed co-labeling of many bone-lining cells by both GFP and TOMATO (Figure 4A), suggesting a contribution of C-KIT<sup>+</sup> cells to osteoblasts. By flow cytometry, approximately 46% of all *Col2.3-GFP*<sup>+</sup> osteoblasts were TOMATO<sup>+</sup> in 2-month-old *Kit*<sup>MerCreMer</sup>; *R26*<sup>tdTomato</sup>; *Col2.3-GFP* mice (Figure 4B).

We performed open fracture surgery on the right femurs of 2-month-old *Kit*<sup>MerCreMer</sup>; *R26*<sup>tdTomato</sup>; *Col2.3-GFP* mice. At 2 weeks after the fracture, we detected a significant amount of *Col2.3-GFP*<sup>+</sup> TOMATO<sup>+</sup> osteoblasts in the callus (Figure 4C). Thus, the C-KIT<sup>+</sup> cell-derived SSCs contribute

to bone formation during development and after bone injury.

We also aged the *Kit*<sup>MerCreMer</sup>; *R26*<sup>tdTomato</sup>; *Col2.3-GFP* mice that had been treated with tamoxifen at E12.5/14.5. We did not observe significant difference in the frequency of CD45<sup>-</sup>TER119<sup>-</sup>CD31<sup>-</sup>PDGFR $\alpha$ <sup>+</sup> bone marrow stromal cells that expressed TOMATO among 2-, 6-, and 12-month-old mice (Figure 4D). The frequencies of *Col2.3-GFP*<sup>+</sup> osteoblasts that expressed TOMATO were also comparable among different ages (Figure 4E), suggesting that C-KIT<sup>+</sup> cell-derived SSCs continuously produce osteoblasts throughout adulthood.

In the bone marrow from 2-month-old *Kit*<sup>MerCreMer</sup>; *R26*<sup>tdTomato</sup>; *Col2.3-GFP* mice that had been treated with tamoxifen at E12.5/14.5, we also detected TOMATO expression in some perilipin<sup>+</sup> marrow adipocytes (Figure 4A). The frequency of TOMATO<sup>+</sup> adipocytes gradually reduced from 23% in 2-month-old mice to 6.3% in 12-month-old mice (Figure 4F).

We administered bromodeoxyuridine (BrdU) to 2-month-old *Kit*<sup>MerCreMer</sup>; *R26*<sup>tdTomato</sup> mice for 14 days. We found that ~6% of TOMATO<sup>+</sup> stromal cells were BrdU<sup>+</sup> (Figure 4G). We also examined the frequency of apoptotic cells in C-KIT<sup>+</sup> cell-derived bone marrow stromal cells. Using flow cytometry, we found only ~3% of TOMATO<sup>+</sup> stromal cells from 6-month-old *Kit*<sup>MerCreMer</sup>; *R26*<sup>tdTomato</sup> mice that were DAPI<sup>+</sup>Annexin V<sup>+</sup> (Figure 4H). Thus, the descendants of C-KIT<sup>+</sup> cells are generally stable and slowly dividing.

### C-KIT<sup>+</sup> Cells Were Important for Bone Development

To determine the physiological importance of C-KIT<sup>+</sup> cells in bone formation, a standard strategy is to block the osteogenic activity of these cells and see how this affected osteogenesis. mTOR is a well-known regulator of skeletogenesis (Chen and Long, 2014; Dai et al., 2017). We deleted *mTor* from C-KIT<sup>+</sup> cells at E12.5/14.5 and performed micro-computed tomography (microCT) analysis of femurs at 2 months of age. The results showed that *Kit*<sup>MerCreMer</sup>; *mTor*<sup>fl/fl</sup> mice had significantly lower trabecular bone volume (Figures 5A and 5C) and trabecular number (Figure 5D), and significantly larger trabecular spacing (Figure 5E), than their littermate controls. In contrast, the cortical bone parameters of *Kit*<sup>MerCreMer</sup>; *mTor*<sup>fl/fl</sup> mice were generally normal (Figures 5B and 5G–5I). The frequency

### Figure 3. scRNA-Sequencing of Tomato<sup>+</sup> and Tomato<sup>-</sup> Stromal Cells from *Kit*<sup>MerCreMer</sup>; *R26*<sup>tdTomato</sup> Mice

(A and B) tSNE plots of single CD45<sup>-</sup>TER119<sup>-</sup>CD31<sup>-</sup>PDGFR $\alpha$ <sup>+</sup> bone marrow stromal cells from 2-month-old *Kit*<sup>MerCreMer</sup>; *R26*<sup>tdTomato</sup> mice that had been treated with tamoxifen at E12.5/14.5. TOMATO<sup>+</sup> and TOMATO<sup>-</sup> sub-fractions were subjected to Smart-seq2-based sequencing. Cells were colored by clusters (A) or sources (B). Cells were purified from 3 mice in three independent experiments. (C–H) tSNE plots of scRNA-seq profiles (points) shaped by sources and colored by expression (Log<sub>10</sub>(FPKM<sup>+1</sup>)) of *Lepr* (C), *Cxcl12* (D), *Gremlin1* (E), *Osteocalcin* (F), *Fabp4* (G), and *Acan* (H). (I–K) Heatmap of genes involved in osteogenic (I), adipogenic (J), and chondrogenic differentiation (K).



**A** *Kit<sup>MerCreMer</sup>; R26<sup>tdTomato</sup>; Col2.3-GFP*, 2-mon-old, Tamoxifen at E12.5/14.5, femur

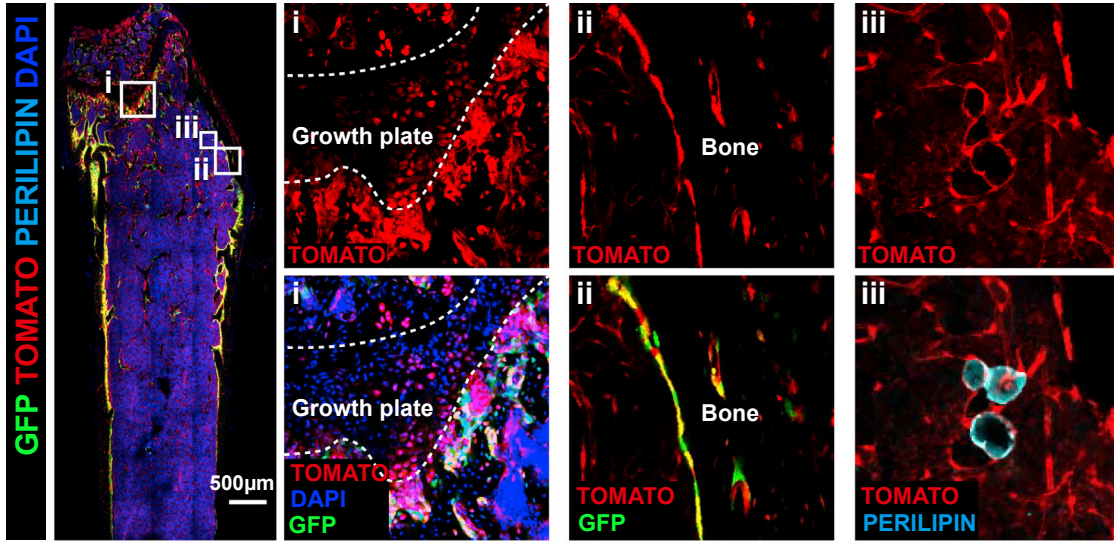

**B** **C** 2 weeks after fracture

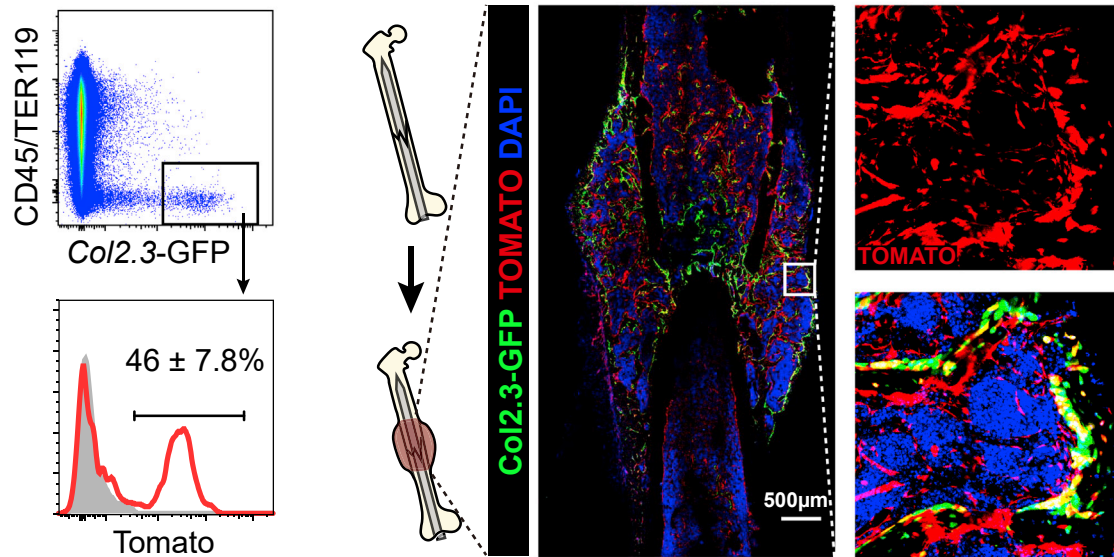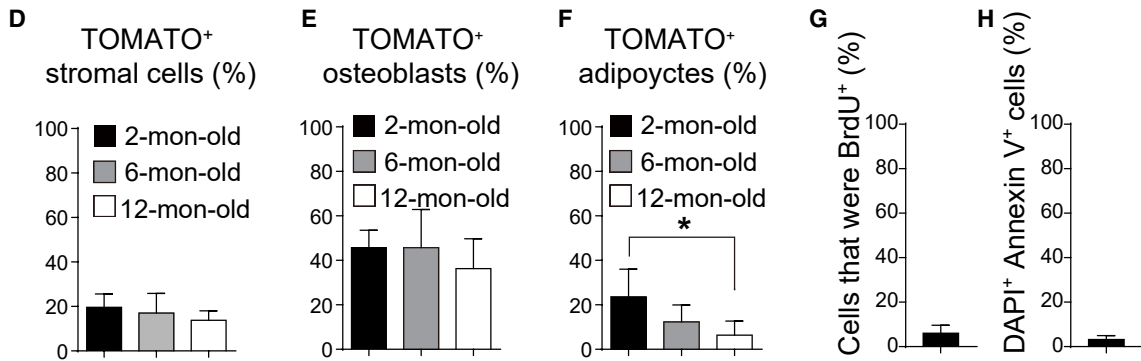

(legend on next page)



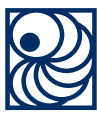

of CD45<sup>-</sup>TER119<sup>-</sup>CD31<sup>-</sup>PDGFR $\alpha$ <sup>+</sup> bone marrow stromal cells that expressed TOMATO was normal in these mice (Figure 5J). Thus, disruption of mTOR signaling from fetal C-KIT<sup>+</sup> cells and their descendants impairs bone formation in young adults.

PPARG is another well-known regulator of bone homeostasis (Wan, 2010). We generated *Kit*<sup>MerCreMer</sup>; *Pparg*<sup>fl/fl</sup> mice and administered tamoxifen to them at E12.5/14.5. At 2 months of age, we found that *Kit*<sup>MerCreMer</sup>; *Pparg*<sup>fl/fl</sup>, and *Pparg*<sup>fl/fl</sup> mice had similar trabecular volume (Figures 5K and 5M), trabecular number (Figure 5N), trabecular spacing (Figure 5O), trabecular thickness (Figure 5P), cortical area (Figures 5L, 5Q, and 5R), and cortical thickness (Figure 5S). The frequency of CD45<sup>-</sup>TER119<sup>-</sup>CD31<sup>-</sup>PDGFR $\alpha$ <sup>+</sup> bone marrow stromal cells that expressed TOMATO was also similar between control and *Pparg*-deficient mice (Figure 5T). In contrast, we did detect a small but significant reduction of the density of perilipin<sup>+</sup> cells in the bone marrow of 2-month-old *Kit*<sup>MerCreMer</sup>; *Pparg*<sup>fl/fl</sup> mice (Figures S3A–S3C). Bone marrow adipocytes were completely absent from *Prx1-cre*; *Pparg*<sup>fl/fl</sup> mice, in which *Pparg* was efficiently deleted from early skeletal progenitor (Figures S3D–S3F), excluding the possibility that the *Pparg*<sup>fl</sup> allele does not work. These data suggested that conditional deletion of *Pparg* from fetal C-KIT<sup>+</sup> cells does not affect bone development.

#### KITL/C-KIT Signaling in Fetal, but Not Adult Bone Marrow, Regulated Osteogenesis

C-KIT regulates stem cell functions through its interaction with KITL. Our data above suggested that C-KIT is expressed by skeletal progenitors in the fetus, but not by SSCs in adults. This raises the possibility that KITL/C-KIT signaling regulates fetal, but not adult SSCs. To test this hypothesis, we took genetic approaches to delete *Kitl* from adult and fetal bone marrow, respectively.

We used *Lepr-Cre* to delete *Kitl* from young adult bone marrow. In the bone marrow from *Lepr*<sup>cre</sup>; *R26*<sup>tdTomato</sup>; *Kitl*<sup>GFP</sup> embryos at E19.5, TOMATO<sup>+</sup> cells were rarely observed (Figure 6A). Although TOMATO<sup>+</sup> cells usually co-expressed *Kitl*-GFP, only a minor fraction of all *Kitl*-GFP<sup>+</sup> cells were TOMATO<sup>+</sup> (Figure 6A). In contrast, in the bone marrow from *Lepr*<sup>cre</sup>; *R26*<sup>tdTomato</sup>; *Kitl*<sup>GFP</sup> mice at 2 month of age, TOMATO<sup>+</sup> stromal cells distributed throughout the bone marrow (Figure 6B). Most *Kitl*-GFP<sup>+</sup> cells co-expressed TOMATO and vice versa (Figures 6B, 6C, S4A, and S4B). Moreover, RNA from bone marrow stromal cells had much less *Kitl* mRNA in 2-month-old *Lepr*<sup>cre</sup>; *Kitl*<sup>fl/fl</sup> mice than in *Kitl*<sup>fl/fl</sup> mice (Figure S4C). Therefore, *Lepr-Cre* recombines efficiently in young adult *Kitl*-expressing cells but poorly in fetal *Kitl*-expressing cells in the bone marrow.

MicroCT analysis of femurs from 2-month-old paired *Kitl*<sup>fl/fl</sup> and *Lepr*<sup>cre</sup>; *Kitl*<sup>fl/fl</sup> mice showed that *Lepr*<sup>cre</sup>; *Kitl*<sup>fl/fl</sup> mice did not differ from *Kitl*<sup>fl/fl</sup> mice in any bone parameters, including trabecular volume (Figures 6D and 6F), trabecular number (Figure 6G), trabecular spacing (Figure 6H), trabecular thickness (Figure 6I), cortical area (Figures 6E, 6J and 6K), and cortical thickness (Figure 6L). The frequencies of CD45<sup>-</sup>TER119<sup>-</sup>CD31<sup>-</sup>PDGFR $\alpha$ <sup>+</sup> bone marrow stromal cells that expressed TOMATO were similar between *Kitl*<sup>fl/fl</sup> and *Lepr*<sup>cre</sup>; *Kitl*<sup>fl/fl</sup> mice (Figure 6M). These data suggested that deletion of *Kitl* from young adult bone marrow does not affect bone formation.

We used *Prx1-Cre* to delete *Kitl* from fetal bone marrow. In *Prx1-cre*; *R26*<sup>tdTomato</sup>; *Kitl*<sup>GFP</sup> embryos at E16.5, TOMATO<sup>+</sup> stromal cells spread throughout the bone marrow (Figure 7A). Virtually all *Kitl*-GFP<sup>+</sup> cells co-expressed TOMATO (Figure 7A). Similarly, in 2-month-old *Prx1-cre*; *R26*<sup>tdTomato</sup>; *Kitl*<sup>GFP</sup> mice, virtually all *Kitl*-GFP<sup>+</sup> bone marrow cells were TOMATO<sup>+</sup>, as revealed by confocal imaging (Figure 7B) and

#### Figure 4. Fetal C-KIT<sup>+</sup> Cells Contributed to Bone Formation and Regeneration in Adult Bone Marrow

All *Kit*<sup>MerCreMer</sup>; *R26*<sup>tdTomato</sup>; Col2.3-GFP and *Kit*<sup>MerCreMer</sup>; *R26*<sup>tdTomato</sup> mice were tamoxifen treated at E12.5 and 14.5.

(A) Representative confocal images of femur sections from 2-month-old *Kit*<sup>MerCreMer</sup>; *R26*<sup>tdTomato</sup>; Col2.3-GFP mice. Osteoblasts were revealed by Col2.3-GFP fluorescence; adipocytes were revealed by anti-perilipin staining. Note that TOMATO was also expressed by hematopoietic cells in these mice but levels of TOMATO expression in stromal cells were ~10- to 100-fold higher than in hematopoietic cells. Therefore, short-exposure images showed mainly TOMATO fluorescence in stromal cells (n = 3 mice from three independent experiments).

(B) Representative flow cytometry plots of enzymatically dissociated femurs showed that 46% of Col2.3-GFP<sup>+</sup> osteoblasts were derived from C-KIT<sup>+</sup> cells in *Kit*<sup>MerCreMer</sup>; *R26*<sup>tdTomato</sup>; Col2.3-GFP mice (n = 3 mice from three independent experiments).

(C) Representative confocal images of the callus region of *Kit*<sup>MerCreMer</sup>; *R26*<sup>tdTomato</sup>; Col2.3-GFP mice at 2 weeks after femur fracture (n = 3 mice from three independent experiments).

(D–F) Frequencies of CD45<sup>-</sup>TER119<sup>-</sup>CD31<sup>-</sup>PDGFR $\alpha$ <sup>+</sup> bone marrow stromal cells (D), Col2.3-GFP<sup>+</sup> osteoblasts (E), and perilipin<sup>+</sup> adipocytes (F) that expressed TOMATO in 2-, 6-, and 12-month-old *Kit*<sup>MerCreMer</sup>; *R26*<sup>tdTomato</sup>; Col2.3-GFP mice. All data represent mean  $\pm$  SD of 3 mice per age from three independent experiments. The statistical significance of differences among different ages was measured by repeated measures one-way ANOVAs with Greenhouse-Geisser correction and Tukey's multiple comparison tests (\*p < 0.05).

(G) BrdU incorporation (14-day pulse) by TOMATO<sup>+</sup> bone marrow stromal cell from 2-month-old *Kit*<sup>MerCreMer</sup>; *R26*<sup>tdTomato</sup> mice (n = 3 mice from three independent experiments).

(H) Percentage of TOMATO<sup>+</sup> bone marrow stromal cells from 2-month-old *Kit*<sup>MerCreMer</sup>; *R26*<sup>tdTomato</sup> mice that were DAPI<sup>+</sup>Annexin V<sup>+</sup> (n = 3 mice from three independent experiments).

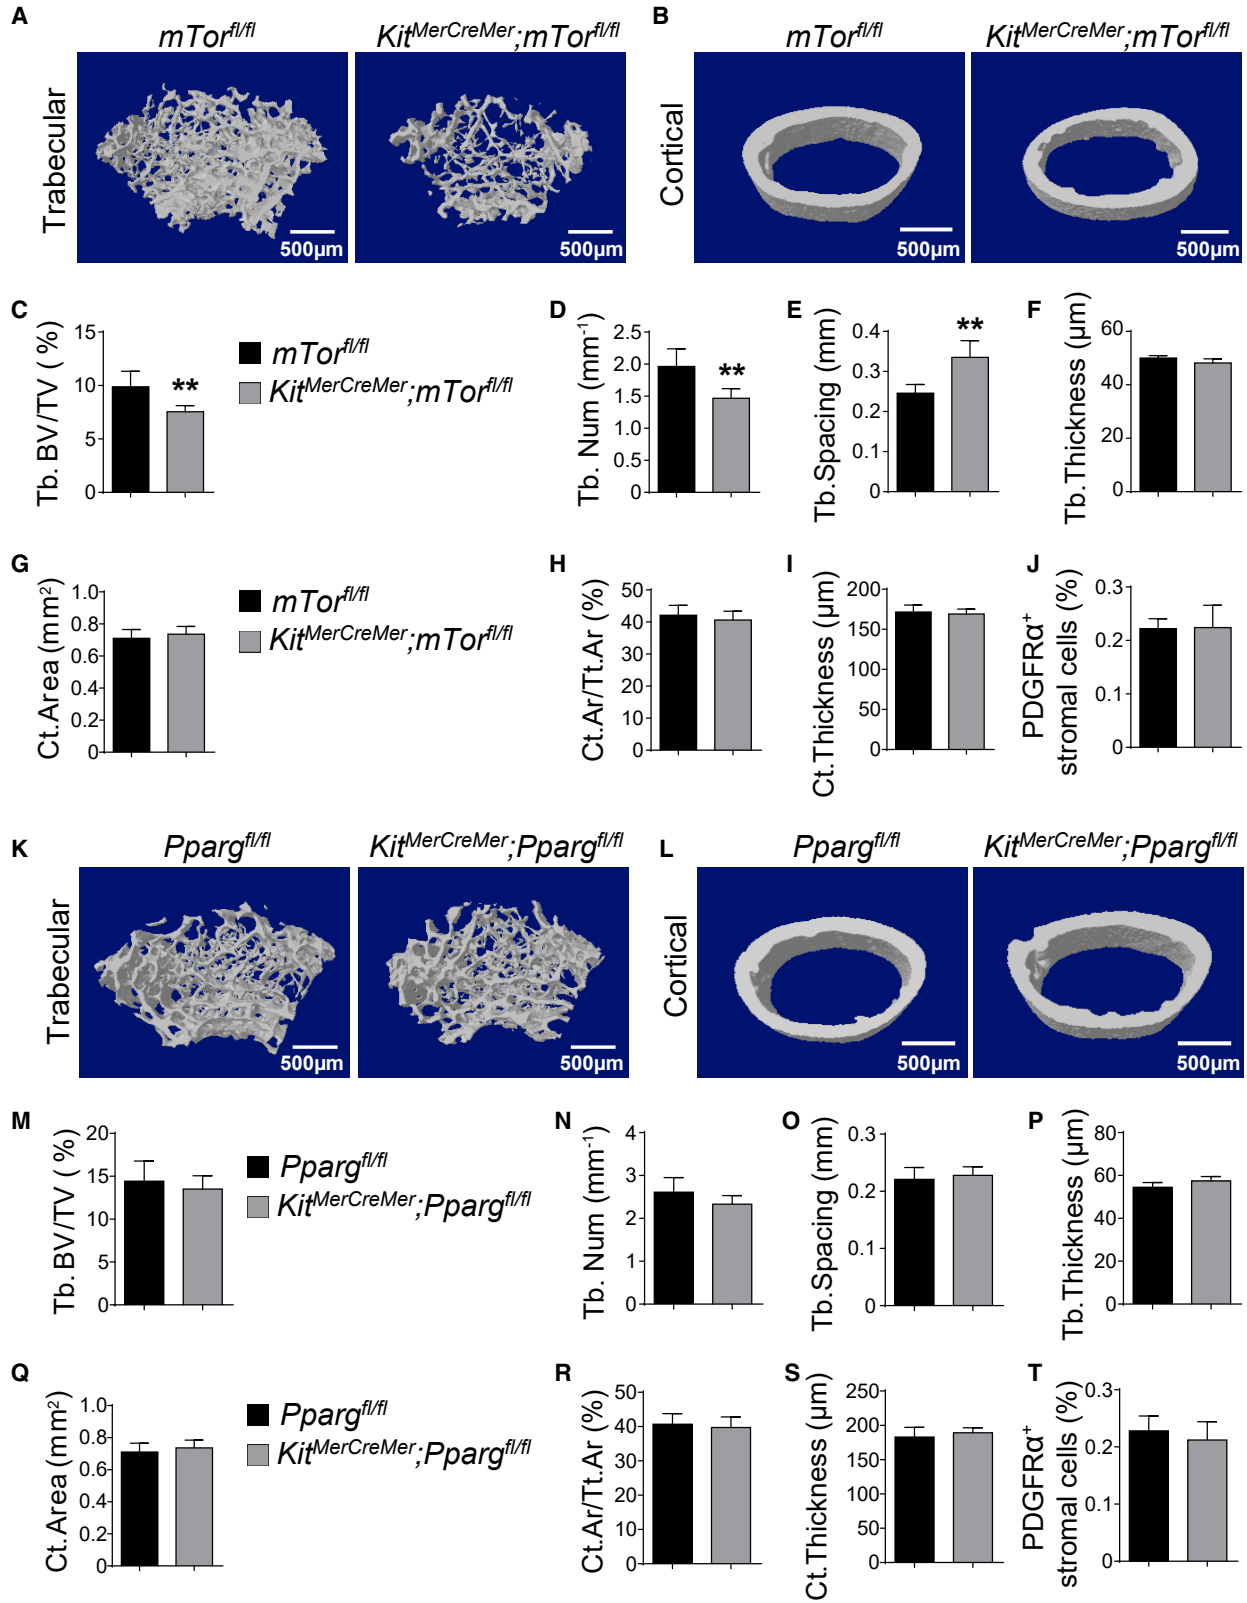

(legend on next page)



flow cytometry (Figures 7C, S5A, and S5B). Moreover, RNA from bone marrow stromal cells had much less *Kitl* mRNA in 2-month-old *Prx1-cre; Kitl<sup>fl/fl</sup>* mice than in *Kitl<sup>fl/fl</sup>* mice (Figure S5C). Therefore, *Prx1-Cre* recombines efficiently in *Kitl*-expressing cells in both fetal and young adult bone marrow stromal cells.

MicroCT analysis showed that 2-month-old *Prx1-cre; Kitl<sup>fl/fl</sup>* mice had significantly increased trabecular bone volume (Figures 7D and 7F), trabecular number (Figure 7G), and trabecular thickness (Figure 7I) and significantly decreased trabecular spacing (Figure 7H) as compared with *Kitl<sup>fl/fl</sup>* mice. All cortical bone parameters, including cortical area (Figures 7E, 7J and 7K) and cortical thickness (Figure 7L), were also significantly increased in *Prx1-cre; Kitl<sup>fl/fl</sup>* mice. The frequency of CD45<sup>+</sup>TER119<sup>-</sup>CD31<sup>-</sup>PDGFR $\alpha$ <sup>+</sup> bone marrow stromal cells that expressed TOMATO was normal in *Prx1-cre; Kitl<sup>fl/fl</sup>* mice (Figure 7M). The density of TRAP<sup>+</sup> osteoblasts in the bone marrow was comparable between *Prx1-cre; Kitl<sup>fl/fl</sup>* and *Kitl<sup>fl/fl</sup>* mice (Figures S5D and S5E). These data suggested that deletion of *Kitl* from fetal bone marrow augments osteogenic differentiation by acting on skeletal progenitors during development.

## DISCUSSION

KITL is a well-known growth factor that keeps stem cells, such as HSCs, in a quiescent state. When *Kitl* is deleted from their niche, stem cells lose quiescence and differentiate. In the new scenario of SSCs, we observed significantly increased bone formation upon *Kitl* deletion from fetal bone marrow stromal cells (Figures 7D–7M). It is likely that C-KIT<sup>+</sup> cells enter into cell cycle and are more prone to differentiate when KITL/C-KIT signaling is blocked. We

speculate that the overall number of C-KIT<sup>+</sup> cell-derived SSCs decreases and the number of C-KIT<sup>+</sup> cell-derived osteoblasts increases in *Prx1-cre; Kitl<sup>fl/fl</sup>* mice. This hypothesis can be tested by genetic tracing C-KIT<sup>+</sup> cells under the background of *Prx1-cre; Kitl<sup>fl/fl</sup>*. However, it will require the generation a new allele with a different recombinase, such as *kit-DreER*.

It had been shown that *Pparg* deletion from *Osx<sup>+</sup>* osteogenic progenitors significantly increased bone formation (Sun et al., 2013). However, we did not observe any changes to any bone parameters after *Pparg* deletion from C-KIT<sup>+</sup> cells (Figures 5K–5T), although we did observe a slight reduction of bone marrow adiposity in these mutant mice (Figures S3A–S3C). A possible explanation is that *Pparg* is required for osteogenesis by SSCs that are not derived from C-KIT<sup>+</sup> cells. There may also be some compensation mechanisms between different SSC subpopulations. When osteogenesis by C-KIT<sup>+</sup> cell-derived SSCs was elevated by *Pparg* deletion, the activity of other SSCs decreases proportionally.

At the current stage, we have not determined the cellular identity of C-KIT<sup>+</sup> skeletal progenitors. Based on the short-term lineage-tracing experiment, C-KIT was expressed by stromal cells at the growth cartilage (Figure S2A). Whether they represent proliferating chondrocytes, hypertrophic chondrocytes, or emerging *Osx<sup>+</sup>* stromal cells during development is not clear yet. Although new evidence has highlighted the importance of fetal and neonatal chondrocytes in bone formation (Mizuhashi et al., 2018; Ono et al., 2014; Zhou et al., 2014b), the bone marrow stromal cells are still believed to be the main source of SSCs for bone formation and regeneration in adult bone marrow (Mizoguchi et al., 2014; Zhou et al., 2014a). Future studies need to address the division-of-labor between different SSC subpopulations in bone formation and regeneration.

### Figure 5. Deletion of *mTor*, but Not *Pparg*, from C-KIT<sup>+</sup> Cells Impaired Bone Development

All data (mean  $\pm$  SD) reflected analyses of femurs from 2-month-old mice that had been tamoxifen treated at E12.5/14.5. Different sexes were examined in different experiments such that most data reflected both male and female mice. Two-tailed Student's t tests were used to assess the statistical significance of differences between sex-matched littermates (\*\**p* < 0.01).

(A and B) Representative microCT images showed trabecular (A) and cortical bones (B) from *mTor<sup>fl/fl</sup>* and *Kit<sup>MerCreMer</sup>; mTor<sup>fl/fl</sup>* mice (n = 5 mice per genotype from three independent experiments).

(C–I) MicroCT analyses of the trabecular bone volume/total bone volume (C), trabecular number (D), spacing (E), thickness (F), cortical area (G), cortical area/total area (H), and thickness (I) of femurs from *mTor<sup>fl/fl</sup>* and *Kit<sup>MerCreMer</sup>; mTor<sup>fl/fl</sup>* mice (n = 5 mice per genotype from three independent experiments).

(J) Frequencies of CD45<sup>+</sup>TER119<sup>-</sup>CD31<sup>-</sup>PDGFR $\alpha$ <sup>+</sup> bone marrow stromal cells in *Pparg<sup>fl/fl</sup>* and *Kit<sup>MerCreMer</sup>; Pparg<sup>fl/fl</sup>* mice (n = 5 mice from three independent experiments).

(K and L) Representative microCT images showed trabecular bone (K) and cortical bone (L) from *Pparg<sup>fl/fl</sup>* and *Kit<sup>MerCreMer</sup>; Pparg<sup>fl/fl</sup>* mice (n = 5 mice per genotype from three independent experiments).

(M–S) MicroCT analyses of the trabecular bone volume/total bone volume (M), trabecular number (N), spacing (O), thickness (P), cortical area (Q), cortical area/total area (R), and thickness (S) of femurs from *Pparg<sup>fl/fl</sup>* and *Kit<sup>MerCreMer</sup>; Pparg<sup>fl/fl</sup>* mice (n = 5 mice per genotype from three independent experiments).

(T) Frequencies of CD45<sup>+</sup>TER119<sup>-</sup>CD31<sup>-</sup>PDGFR $\alpha$ <sup>+</sup> bone marrow stromal cells in *Pparg<sup>fl/fl</sup>* and *Kit<sup>MerCreMer</sup>; Pparg<sup>fl/fl</sup>* mice (n = 5 mice per genotype from three independent experiments).

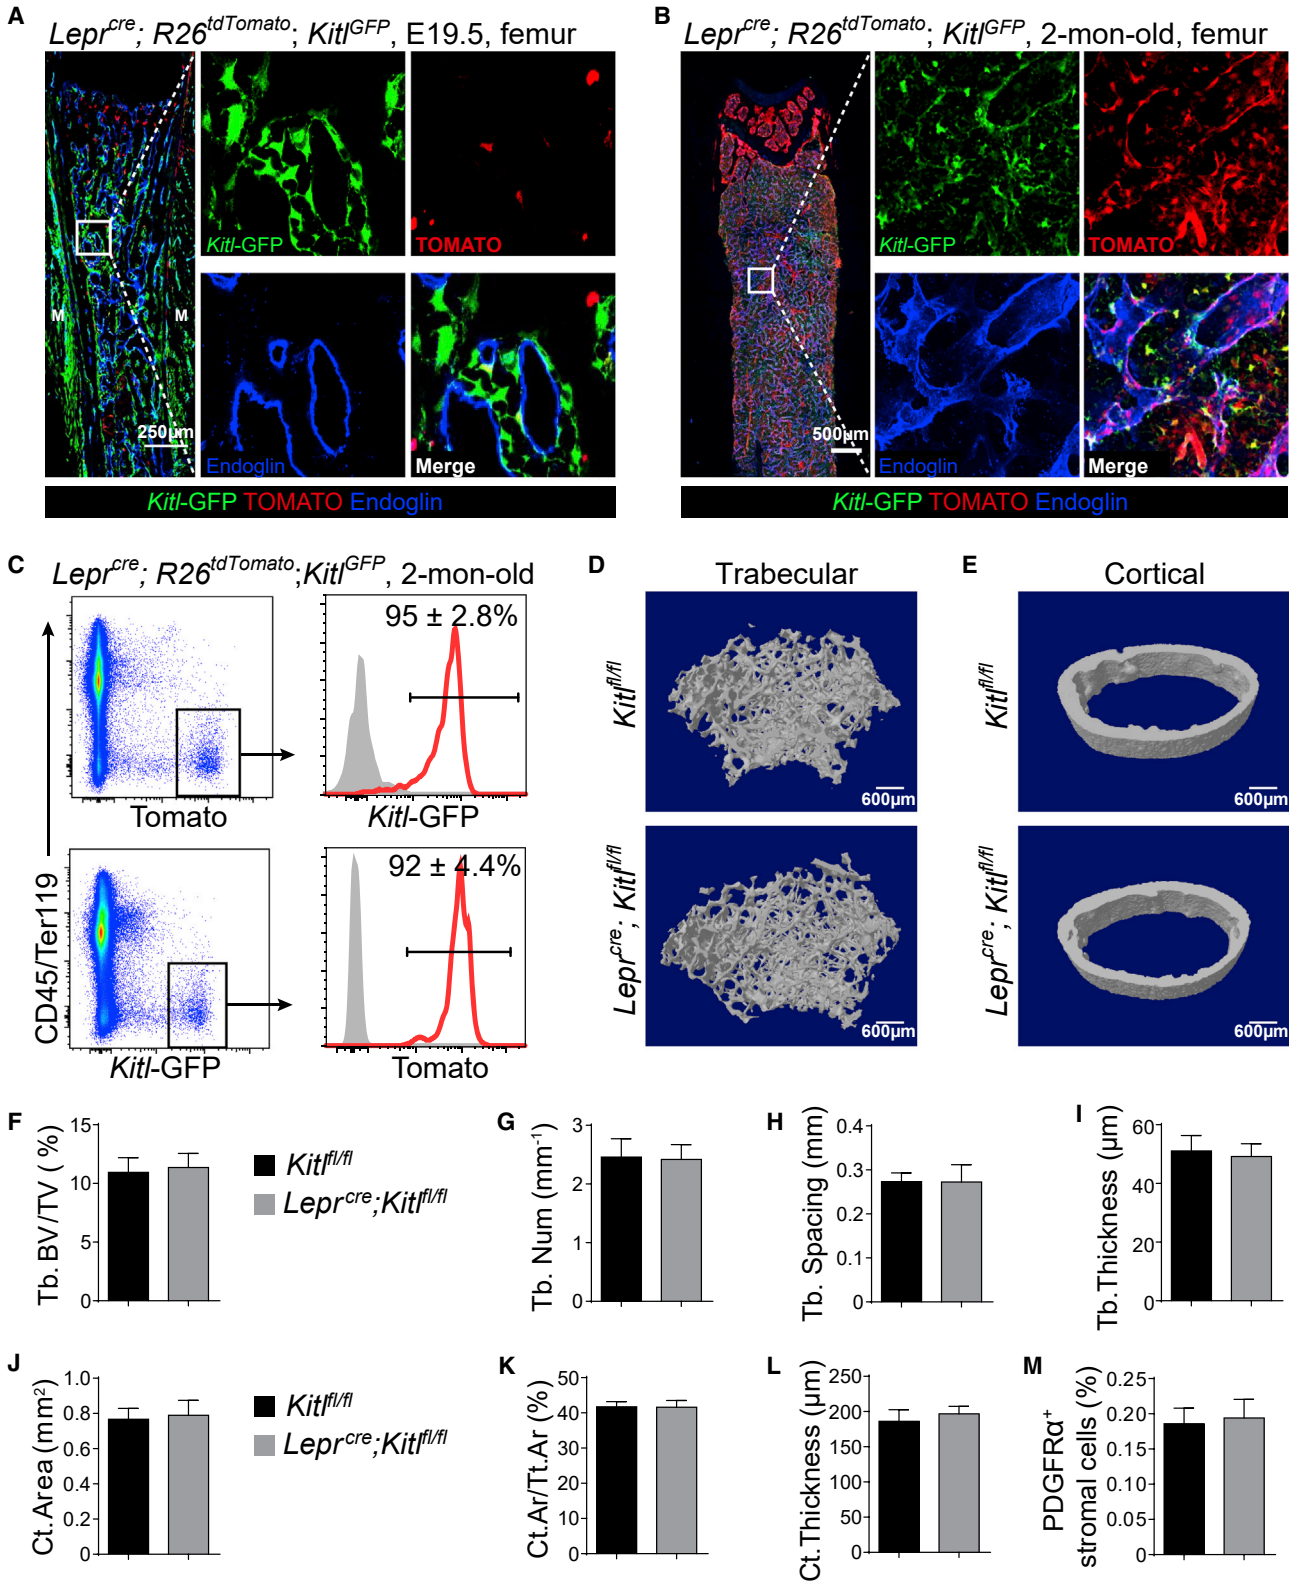

(legend on next page)

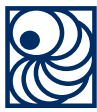

Our data showed that tracing C-KIT<sup>+</sup> cells labeled osteoclasts at endosteal regions (Figure S1B). This is expected as osteoclasts are one of the myeloid lineages that are derived from C-KIT<sup>+</sup> HSCs. Although conditional deletion of *Scf* from bone marrow stromal cells reduced HSC frequency (Ding et al., 2012), it did not affect the frequency of osteoclasts in the bone marrow (Figures S5D and S5E). Unlike *Prx1-cre; Scf<sup>fl/fl</sup>* mice, which showed increased bone formation (Figures 7D–7L), mice carrying *Kit* loss-of-function mutation exhibited an osteopenia phenotype, likely due to elevated osteoclast differentiation (Lotinun and Krishnamra, 2016). Although we cannot fully rule out the possibility that conditional *Scf* deletion by *Prx1-Cre* affects bone resorption, the different phenotypes of conditional *Scf* mutants and germline *Kit* mutants imply that they attribute to distinct mechanisms.

## EXPERIMENTAL PROCEDURES

### Mice

*Kit<sup>MerCreMer</sup>* (van Berlo et al., 2014), *R26<sup>tdTomato</sup>* (Madisen et al., 2010), *Col2.3-GFP* (Kalajzic et al., 2002), *mTor<sup>fl/fl</sup>* (Risson et al., 2009), *Pparg<sup>fl/fl</sup>* (He et al., 2003), *Kitl<sup>GFP</sup>* (Ding et al., 2012), *Kitl<sup>fl/fl</sup>* (Ding et al., 2012), *Lepr<sup>cre</sup>* (Cohen et al., 2001), and *Prx1-cre* (Logan et al., 2002) mice were housed in the Animal Facility at Shanghai Institute of Biochemistry and Cell Biology (SIBCB), Chinese Academy of Sciences. To induce CreER activity in neonatal mice, breeder mice were gavaged with 2 mg tamoxifen (Sigma) dissolved in corn oil daily for 3 consecutive days. To induce CreER activity in embryos, pregnant mice were gavaged with 1 mg tamoxifen, together with 0.5 mg progesterone (to avoid abortion, Sigma), dissolved in corn oil. All procedures were approved by the Institutional Animal Care and Use Committees of SIBCB.

### Flow Cytometry

Whole bone marrow cells were flushed using Hank's balanced salt solution (HBSS) (Mg<sup>2+</sup> and Ca<sup>2+</sup> plus) and digested with 200 U/mL DNase I and 250 µg/mL Collagenase I and IV (Worthington) at 37°C for 30 min. Cell suspension in 100 µL HBSS with 2% bovine serum was stained with antibodies, including anti-LEPR-biotin (1:100, R&D Systems, BAF497), anti-CD45 (1:200, eBioscience,

30F-11), anti-CD31 (1:200, eBioscience, 390), anti-TER119 (1:200, eBioscience, TER-119), anti-SCA-1 (1:200, eBioscience, E13–161.7), and/or anti-PDGFR $\alpha$ -biotin (1:100, BioLegend, APA5), and then brilliant violet 421 streptavidin (1:500, BioLegend). Samples were analyzed using a FACSCelesta flow cytometer (BD Biosciences). Data were analyzed by FlowJo software.

For BrdU incorporation assays, mice were given an intraperitoneal injection of 1 mg BrdU (Sigma) per 6 g of body mass in PBS and maintained on 1 mg/mL of BrdU in the drinking water for 14 days. The frequency of BrdU<sup>+</sup> cells was then analyzed by flow cytometry using the APC BrdU Flow Kit (BD Biosciences).

For apoptotic cell staining, cells were stained by anti-Annexin V antibody before flow cytometry following the manufacture's introductions (Thermo Fisher).

### Bone Sectioning, Immunostaining, and Confocal Imaging

Freshly dissected femurs were fixed in 4% paraformaldehyde overnight followed by 3-day decalcification in 10% EDTA. O.C.T. (SciGen)-embedded bones were sectioned using the CryoJane Tape-Transfer system (Leica Biosystems). Sections were blocked in PBS with 5% donkey serum for 1 h and then stained overnight with rabbit-anti-perilipin (Sigma, 1:800, P1873), goat-anti-ENDOGLIN (R&D, 1:500, AF1320), rabbit-anti-TRAP (Abcam, 1:200, ab185716) or rabbit-anti-AGGRECAN (Millipore, 1:400, AB1031). Donkey anti-rabbit Alexa Fluor 647 or donkey anti-goat Alexa Fluor 647 were used as secondary antibody (both from Invitrogen, 1:500). Non-immune immunoglobulins of the same isotype as the primary antibodies were used as negative controls. Slides were mounted with anti-fade solution (Invitrogen). Images were acquired with a Zeiss LSM880 or a Leica SP8 confocal microscope.

### Colony-Forming Efficiency Assay and *In Vitro* Differentiation

Whole bone marrow or sorted cells were cultured in six-well plates at densities ensuring that colonies would form at clonal density. The cultures were incubated at 37°C in a gas-tight chamber (Billups-Rothenberg) with 5% O<sub>2</sub> and 10% CO<sub>2</sub> for 7–14 days. For *in vitro* differentiation assays, Colonies were digested with 0.25% Trypsin/EDTA, pooled together, and then separated into three aliquots permissive for adipocyte, chondrocyte, and

### Figure 6. Deletion of *Kitl* After Birth Did Not Affect Osteogenesis

(A and B) Representative confocal images of femur sections from *Lepr<sup>cre</sup>; R26<sup>tdTomato</sup>; Kitl<sup>GFP</sup>* mice at E19.5 (A) or 2 months of age (B). Bone marrow vessels were revealed by anti-ENDOGLIN staining (n = 3 mice/age from three independent experiments). (C) Representative flow cytometry plots of enzymatically dissociated bone marrow cells from 2-month-old *Lepr<sup>cre</sup>; R26<sup>tdTomato</sup>; Kitl<sup>GFP</sup>* mice showed that most TOMATO<sup>+</sup> cells were GFP<sup>+</sup> and vice versa (n = 3 mice from three independent experiments). (D and E) Representative microCT images showed trabecular bone (D) and cortical bone (E) from *Kitl<sup>fl/fl</sup>* and *Lepr<sup>cre</sup>; Kitl<sup>fl/fl</sup>* mice (n = 5 mice per genotype from three independent experiments). (F–L) MicroCT analyses of the trabecular bone volume/total bone volume (F), trabecular number (G), spacing (H), thickness (I), cortical area (J), cortical area/total area (K), and thickness (L) of femurs from *Kitl<sup>fl/fl</sup>* and *Lepr<sup>cre</sup>; Kitl<sup>fl/fl</sup>* mice (n = 5 mice per genotype from three independent experiments). (M) Frequencies of CD45<sup>+</sup> TER119<sup>+</sup> CD31<sup>+</sup> PDGFR $\alpha$ <sup>+</sup> bone marrow stromal cells in *Kitl<sup>fl/fl</sup>* and *Lepr<sup>cre</sup>; Kitl<sup>fl/fl</sup>* mice (n = 5 mice per genotype from three independent experiments). Two-tailed Student's t tests were used to assess the statistical significance of differences between sex-matched littermates in (F–M).

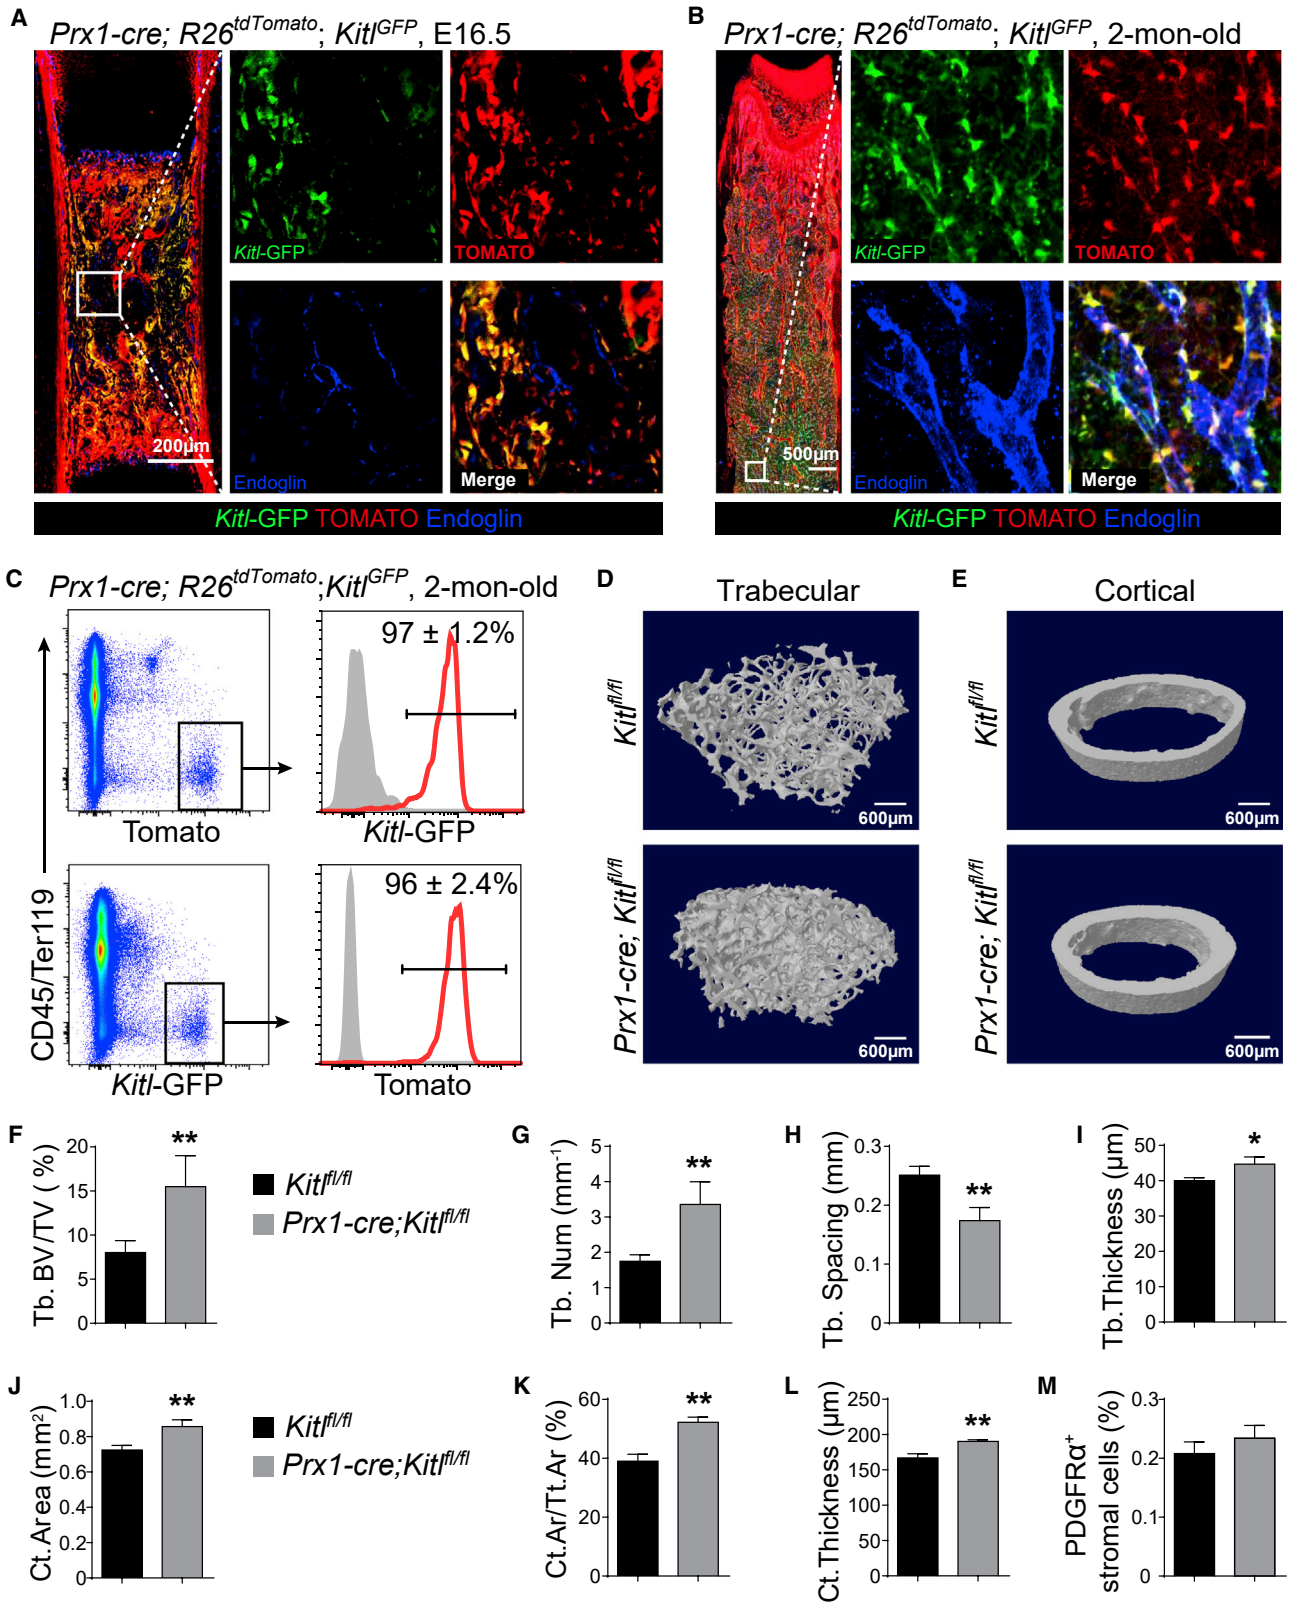

(legend on next page)



osteoblastic differentiation, respectively. Adipogenic and osteogenic differentiation was performed in 6-well plates while chondrogenic differentiation was performed as pellets in 15-mL tubes. Adipocyte, chondrocyte, and osteoblastic differentiation was induced with StemPro differentiation kits (Invitrogen) and detected by staining with oil red O (Sigma), alcian blue (Sigma) and alizarin red S (Sigma), respectively.

### Subcutaneous Ossicle Formation Assay

Colonies from ~500 flow cytometry-purified bone marrow stromal cells were passaged to generate ~10<sup>6</sup> cells, then transferred into 6 × 6 × 6 mm sterile collagen sponges (Gelfoam; Pfizer) and incubated at 37°C for 2 h. Cell-loaded sponges were then transplanted subcutaneously into recipient mice. The sponges were harvested 8 weeks after transplantation and examined by hematoxylin and eosin staining.

### Single-Cell RNA-Seq

Single cells were sorted into 96-well plates (Bio-Rad, HSP9601) on a 4°C holder and subjected to a modified full-length single-cell RNA-seq protocol (Smart-seq2) (Chen et al., 2017). In brief, cells were lysed in single-cell RNA lysis buffer containing 0.45% NP-40, then subjected to reverse transcription with SuperScript II reverse transcriptase (Invitrogen) and whole transcription amplification with a KAPA HiFi HotStart ReadyMix (2×; KAPA Biosystems). PCR products were purified with AMPure XP beads (Agencourt) and quantified with a Qubit dsDNA HS Assay Kit (Thermo Fisher). cDNA libraries were constructed with a Nextera XT DNA Library Preparation Kit (Illumina) and were sequenced on an Illumina HiSeq X Ten instrument in 150-bp paired-end-read mode by Berry Genomics. The amplification, cDNA purification, and library construction were performed on the Agilent Bravo automatic liquid-handling platform in the core facility for molecular biology at SIBCB.

GEO accession number for RNA-seq data: GSE146002.

### Preparing Total RNA for qRT-PCR

Cells were sorted directly into TRIzol. Total RNA was extracted according to the manufacturer's instructions (Invitrogen). Total RNA was subjected to reverse transcription and then qRT-PCR using SYBR green on a LightCycler 96 system (Roche). Primers used in

this study were:  $\beta$ -actin: 5'-GCTCTTTTCCAGCCTTCCTT-3' and 5'-CTTCTGCATCCTGTCAGCAA-3'; *Kitl*: 5'-GCCAGAACTAGATCCTTTACTCCTGA-3' and 5'-CATAAATGGTTTTGTGACACTGACTCTG-3'.

### Single-Cell RNA-Seq Data Analysis

Sequencing quality of raw data was evaluated by FASTQC. Reads were aligned to the GRCm38 genome using HISAT (version 2-2.1.0) (Pertea et al., 2016), and gene counts were generated using HTseq (version 0.6.0) with default parameters. All mapped reads were processed by StringTie (version 1.3.3b) to evaluate the gene expression levels (measured by FPKM [fragments per kilobase per million]) with default parameters. After that, gene expression values for each cell were log<sub>10</sub> (FPKM+1) transformed. Highly variable genes were used for principal-component analysis, and then the top 500 PC loading genes for each of PC1-5 (using FactoMineR in R) were chosen to perform clustering analysis. Seurat package (version 3.0) (Butler et al., 2018) was used and UMAP was applied to visualize the results. Differential expressed genes were identified by using DESeq2 with log<sub>2</sub> (fold change) > 1.5 and at a false discovery rate < 0.01 (Love et al., 2014).

### Analysis of Bone Volume by MicroCT

Femurs were fixed in 70% ethanol and scanned at an isotropic voxel size of 10  $\mu$ m (80 kV, 450  $\mu$ A, and 2,000 ms integration time) with a SkyScan1176 MicroCT scanner (Bruker). Three-dimensional images were reconstructed using a fixed threshold. The bone microstructure was then analyzed according to the literature (Bouxsein et al., 2010).

### Bone Fracture

After mouse anesthesia using an isoflurane tank, one of the mouse legs was shaved, scrubbed with alcohol and then betadine. To stabilize impending fractures a 0.01-inch-diameter, stainless-steel wire was retrogradely inserted into the intramedullary canal of the tibia. Fracture was then produced by 3-point bending and the wound was sealed by non-absorbable sutures. Buprenorphine was then used. The mouse would not be transferred into the cage until it was fully recovered. The mouse was then housed in an independent cage and checked twice a day. The steel wire was moved out of the marrow 12 days after the fracture.

## Figure 7. Deletion of *Kitl* in Fetus Increased Osteogenesis During Development

(A and B) Representative confocal images of femur sections from *Prx1-cre; R26<sup>tdTomato</sup>; Kitl<sup>GFP</sup>* mice at E19.5 (A) or 2 months of age (B). Bone marrow vessels were revealed by anti-ENDOGLIN staining (n = 3 mice/age from three independent experiments). (C) Representative flow cytometry plots of enzymatically dissociated bone marrow cells from 2-month-old *Prx1-cre; R26<sup>tdTomato</sup>; Kitl<sup>GFP</sup>* mice showed that most TOMATO<sup>+</sup> cells were GFP<sup>+</sup> and vice versa (n = 3 mice from three independent experiments). (D and E) Representative microCT images showed trabecular bone (D) and cortical bone (E) from *Kitl<sup>fl/fl</sup>* and *Prx1-cre; Kitl<sup>fl/fl</sup>* mice (n = 5 mice per genotype from three independent experiments). (F–L) MicroCT analyses of the trabecular bone volume/total bone volume (F), trabecular number (G), spacing (H), thickness (I), cortical area (J), cortical area/total area (K), and thickness (L) of femurs from *Kitl<sup>fl/fl</sup>* and *Prx1-cre; Kitl<sup>fl/fl</sup>* mice (n = 5 mice per genotype from three independent experiments). (M) Frequencies of CD45<sup>+</sup> TER119<sup>+</sup> CD31<sup>+</sup> PDGFR $\alpha$ <sup>+</sup> bone marrow stromal cells in *Kitl<sup>fl/fl</sup>* and *Prx1-cre; Kitl<sup>fl/fl</sup>* mice (n = 5 mice per genotype from three independent experiments). Two-tailed Student's t tests were used to assess the statistical significance of differences between sex-matched littermates in (F–M) (\*p < 0.05, \*\*p < 0.01).



## Statistical Methods

Data in all figures represent multiple independent experiments performed on different days with different mice. Sample sizes were not based on power calculations. No randomization or blinding was performed. Variation is always indicated using standard deviation. For analysis of the statistical significance of differences between the two groups, we performed two-tailed Student's *t* tests. For analysis of the statistical significance of differences among three or more groups, we performed repeated measures one-way ANOVAs with Greenhouse-Geisser correction (if variances between groups were not equal) and Tukey's multiple comparison tests with individual variances computed for each comparison.

## SUPPLEMENTAL INFORMATION

Supplemental Information can be found online at <https://doi.org/10.1016/j.stemcr.2020.03.001>.

## AUTHOR CONTRIBUTIONS

D.D.H. and B.O.Z. conceived and initiated the project. D.D.H. analyzed *mTor*, *Pparg*, and *Kitl* conditional mutant mice. X.T.T. conducted most flow cytometry experiments. G.C., X.T.T., G.P., and N.J. performed scRNA-seq analyses. W.D. performed most immunostaining and confocal imaging experiments. X.Y. performed all *in vitro* experiments. Y.C. assisted in confocal microscopy. B.O.Z. and X.T.T. wrote the manuscript.

## ACKNOWLEDGMENTS

We thank X. Fang from Beijing Institute of Genomics for technical support in bioinformatic and statistical analysis. This work was supported by the National Key Program on Stem Cell and Translational Research (2017YFA0106400 and 2018YFA0107201), the Strategic Priority Research Program on Stem Cell and Translational Research (2017YFA0106400), the National Natural Science Foundation of China (31771637 and 81730006), and a SKLEH-Pilot Research Grant (ZK17-04). None of the authors of this work has a financial interest related to this work.

Received: June 16, 2019

Revised: February 29, 2020

Accepted: March 2, 2020

Published: March 26, 2020

## REFERENCES

Bianco, P., Kuznetsov, S.A., Riminucci, M., and Gehron Robey, P. (2006). Postnatal skeletal stem cells. *Methods Enzymol.* *419*, 117–148.

Bianco, P., and Robey, P.G. (2015). Skeletal stem cells. *Development* *142*, 1023–1027.

Bouxsein, M.L., Boyd, S.K., Christiansen, B.A., Guldborg, R.E., Jepsen, K.J., and Muller, R. (2010). Guidelines for assessment of bone microstructure in rodents using micro-computed tomography. *J. Bone Miner Res.* *25*, 1468–1486.

Butler, A., Hoffman, P., Smibert, P., Papalex, E., and Satija, R. (2018). Integrating single-cell transcriptomic data across different

conditions, technologies, and species. *Nat. Biotechnol.* *36*, 411–420.

Chan, C.K., Seo, E.Y., Chen, J.Y., Lo, D., McArdle, A., Sinha, R., Tevlin, R., Seita, J., Vincent-Tompkins, J., Wearda, T., et al. (2015). Identification and specification of the mouse skeletal stem cell. *Cell* *160*, 285–298.

Chen, J., and Long, F. (2014). mTORC1 signaling controls mammalian skeletal growth through stimulation of protein synthesis. *Development* *141*, 2848–2854.

Chen, J., Suo, S., Tam, P.P., Han, J.J., Peng, G., and Jing, N. (2017). Spatial transcriptomic analysis of cryosectioned tissue samples with Geo-seq. *Nat. Protoc.* *12*, 566–580.

Cohen, P., Zhao, C., Cai, X., Montez, J.M., Rohani, S.C., Feinstein, P., Mombaerts, P., and Friedman, J.M. (2001). Selective deletion of leptin receptor in neurons leads to obesity. *J. Clin. Invest.* *108*, 1113–1121.

Dai, Q., Xu, Z., Ma, X., Niu, N., Zhou, S., Xie, F., Jiang, L., Wang, J., and Zou, W. (2017). mTOR/Raptor signaling is critical for skeletogenesis in mice through the regulation of Runx2 expression. *Cell Death Differ.* *24*, 1886–1899.

Debnath, S., Yallowitz, A.R., McCormick, J., Lalani, S., Zhang, T., Xu, R., Li, N., Liu, Y., Yang, Y.S., Eiseman, M., et al. (2018). Discovery of a periosteal stem cell mediating intramembranous bone formation. *Nature* *562*, 133–139.

Deng, W. (2010). Mesenchymal stem cells express C-KIT. *Circ. Res.* *107*, e17, author reply e18.

Deng, W., St Hilaire, R.C., Chattergoon, N.N., Jeter, J.R., Jr., and Kadowitz, P.J. (2006). Inhibition of vascular smooth muscle cell proliferation *in vitro* by genetically engineered marrow stromal cells secreting calcitonin gene-related peptide. *Life Sci.* *78*, 1830–1838.

Ding, L., Saunders, T.L., Enikolopov, G., and Morrison, S.J. (2012). Endothelial and perivascular cells maintain haematopoietic stem cells. *Nature* *481*, 457–462.

Friedenstein, A.J., Chailakhjan, R.K., and Lalykina, K.S. (1970). The development of fibroblast colonies in monolayer cultures of Guinea-pig bone marrow and spleen cells. *Cell Tissue Kinet.* *3*, 393–403.

Greenbaum, A., Hsu, Y.M., Day, R.B., Schuettpelz, L.G., Christopher, M.J., Borgerding, J.N., Nagasawa, T., and Link, D.C. (2013). CXCL12 in early mesenchymal progenitors is required for haematopoietic stem-cell maintenance. *Nature* *495*, 227–230.

Hatzistergos, K.E., Quevedo, H., Oskouei, B.N., Hu, Q., Feigenbaum, G.S., Margitich, I.S., Mazhari, R., Boyle, A.J., Zambrano, J.P., Rodriguez, J.E., et al. (2010). Bone marrow mesenchymal stem cells stimulate cardiac stem cell proliferation and differentiation. *Circ. Res.* *107*, 913–922.

He, W., Barak, Y., Hevener, A., Olson, P., Liao, D., Le, J., Nelson, M., Ong, E., Olefsky, J.M., and Evans, R.M. (2003). Adipose-specific peroxisome proliferator-activated receptor gamma knockout causes insulin resistance in fat and liver but not in muscle. *Proc. Natl. Acad. Sci. U S A* *100*, 15712–15717.

Kalajzic, Z., Liu, P., Kalajzic, I., Du, Z., Braut, A., Mina, M., Canalis, E., and Rowe, D.W. (2002). Directing the expression of a green fluorescent protein transgene in differentiated osteoblasts: comparison



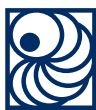

- between rat type I collagen and rat osteocalcin promoters. *Bone* **31**, 654–660.
- Kunisaki, Y., Bruns, I., Scheiermann, C., Ahmed, J., Pinho, S., Zhang, D., Mizoguchi, T., Wei, Q., Lucas, D., Ito, K., et al. (2013). Arteriolar niches maintain haematopoietic stem cell quiescence. *Nature* **502**, 637–643.
- Logan, M., Martin, J.F., Nagy, A., Lobe, C., Olson, E.N., and Tabin, C.J. (2002). Expression of Cre recombinase in the developing mouse limb bud driven by a Prxl enhancer. *Genesis* **33**, 77–80.
- Lotinun, S., and Krishnamra, N. (2016). Disruption of c-kit signaling in kit(W-sh/W-sh) growing mice increases bone turnover. *Sci. Rep.* **6**, 31515.
- Love, M.I., Huber, W., and Anders, S. (2014). Moderated estimation of fold change and dispersion for RNA-seq data with DESeq2. *Genome Biol.* **15**, 550.
- Madisen, L., Zwingman, T.A., Sunkin, S.M., Oh, S.W., Zariwala, H.A., Gu, H., Ng, L.L., Palmiter, R.D., Hawrylycz, M.J., Jones, A.R., et al. (2010). A robust and high-throughput Cre reporting and characterization system for the whole mouse brain. *Nat. Neurosci.* **13**, 133–140.
- Maes, C., Kobayashi, T., Selig, M.K., Torrekens, S., Roth, S.I., Mackem, S., Carmeliet, G., and Kronenberg, H.M. (2010). Osteoblast precursors, but not mature osteoblasts, move into developing and fractured bones along with invading blood vessels. *Dev. Cell* **19**, 329–344.
- Mendez-Ferrer, S., Michurina, T.V., Ferraro, F., Mazloom, A.R., Maccarthur, B.D., Lira, S.A., Scadden, D.T., Ma'ayan, A., Enikolopov, G.N., and Frenette, P.S. (2010). Mesenchymal and haematopoietic stem cells form a unique bone marrow niche. *Nature* **466**, 829–834.
- Mizoguchi, T., Pinho, S., Ahmed, J., Kunisaki, Y., Hanoun, M., Mendelson, A., Ono, N., Kronenberg, H.M., and Frenette, P.S. (2014). Osterix marks distinct waves of primitive and definitive stromal progenitors during bone marrow development. *Dev. Cell* **29**, 340–349.
- Mizuhashi, K., Ono, W., Matsushita, Y., Sakagami, N., Takahashi, A., Saunders, T.L., Nagasawa, T., Kronenberg, H.M., and Ono, N. (2018). Resting zone of the growth plate houses a unique class of skeletal stem cells. *Nature* **563**, 254–258.
- Morikawa, S., Mabuchi, Y., Kubota, Y., Nagai, Y., Niibe, K., Hiratsu, E., Suzuki, S., Miyauchi-Hara, C., Nagoshi, N., Sunabori, T., et al. (2009). Prospective identification, isolation, and systemic transplantation of multipotent mesenchymal stem cells in murine bone marrow. *J. Exp. Med.* **206**, 2483–2496.
- Ono, N., Ono, W., Nagasawa, T., and Kronenberg, H.M. (2014). A subset of chondrogenic cells provides early mesenchymal progenitors in growing bones. *Nat. Cell Biol.* **16**, 1157–1167.
- Park, D., Spencer, J.A., Koh, B.I., Kobayashi, T., Fujisaki, J., Clemens, T.L., Lin, C.P., Kronenberg, H.M., and Scadden, D.T. (2012). Endogenous bone marrow MSCs are dynamic, fate-restricted participants in bone maintenance and regeneration. *Cell Stem Cell* **10**, 259–272.
- Perteau, M., Kim, D., Perteau, G.M., Leek, J.T., and Salzberg, S.L. (2016). Transcript-level expression analysis of RNA-seq experiments with HISAT, StringTie and Ballgown. *Nat. Protoc.* **11**, 1650–1667.
- Pittenger, M.F., Mackay, A.M., Beck, S.C., Jaiswal, R.K., Douglas, R., Mosca, J.D., Moorman, M.A., Simonetti, D.W., Craig, S., and Marshak, D.R. (1999). Multilineage potential of adult human mesenchymal stem cells. *Science* **284**, 143–147.
- Risson, V., Mazelin, L., Roceri, M., Sanchez, H., Moncollin, V., Corneloup, C., Richard-Bulteau, H., Vignaud, A., Baas, D., Defour, A., et al. (2009). Muscle inactivation of mTOR causes metabolic and dystrophin defects leading to severe myopathy. *J. Cell Biol.* **187**, 859–874.
- Sacchetti, B., Funari, A., Michienzi, S., Di Cesare, S., Piersanti, S., Saggio, I., Tagliafico, E., Ferrari, S., Robey, P.G., Riminucci, M., et al. (2007). Self-renewing osteoprogenitors in bone marrow sinusoids can organize a hematopoietic microenvironment. *Cell* **131**, 324–336.
- Shi, Y., He, G., Lee, W.C., McKenzie, J.A., Silva, M.J., and Long, F. (2017). Gli1 identifies osteogenic progenitors for bone formation and fracture repair. *Nat. Commun.* **8**, 2043.
- Sun, H., Kim, J.K., Mortensen, R., Mutyaba, L.P., Hankenson, K.D., and Krebsbach, P.H. (2013). Osteoblast-targeted suppression of PPARgamma increases osteogenesis through activation of mTOR signaling. *Stem Cells* **31**, 2183–2192.
- van Berlo, J.H., Kanisicak, O., Maillet, M., Vagnozzi, R.J., Karch, J., Lin, S.C., Middleton, R.C., Marban, E., and Molkenkin, J.D. (2014). C-KIT+ cells minimally contribute cardiomyocytes to the heart. *Nature* **509**, 337–341.
- Wan, Y. (2010). PPARgamma in bone homeostasis. *Trends Endocrinol. Metab.* **21**, 722–728.
- Worthley, D.L., Churchill, M., Compton, J.T., Taylor, Y., Rao, M., Si, Y., Levin, D., Schwartz, M.G., Uygur, A., Hayakawa, Y., et al. (2015). Gremlin 1 identifies a skeletal stem cell with bone, cartilage, and reticular stromal potential. *Cell* **160**, 269–284.
- Zhou, B.O., Yu, H., Yue, R., Zhao, Z., Rios, J.J., Naveiras, O., and Morrison, S.J. (2017). Bone marrow adipocytes promote the regeneration of stem cells and haematopoiesis by secreting SCF. *Nat. Cell Biol.* **19**, 891–903.
- Zhou, B.O., Yue, R., Murphy, M.M., Peyer, J.G., and Morrison, S.J. (2014a). Leptin-receptor-expressing mesenchymal stromal cells represent the main source of bone formed by adult bone marrow. *Cell Stem Cell* **15**, 1042–1055.
- Zhou, X., von der Mark, K., Henry, S., Norton, W., Adams, H., and de Crombrughe, B. (2014b). Chondrocytes transdifferentiate into osteoblasts in endochondral bone during development, postnatal growth and fracture healing in mice. *PLoS Genet.* **10**, e1004820.

**Stem Cell Reports, Volume 14**

**Supplemental Information**

**C-KIT Expression Distinguishes Fetal from Postnatal Skeletal Progenitors**

**Di Demi He, Xinyu Thomas Tang, Wenjie Dong, Guizhong Cui, Guangdun Peng, Xiujuan Yin, Yujie Chen, Naihe Jing, and Bo O. Zhou**

1 **Supplementary Figure Legends**

2 **Figure S1. Analyses of *Kit*<sup>MerCreMer</sup>; *R26*<sup>tdTomato</sup> mice.**

3 (A) Representative confocal images of femur sections from *Kit*<sup>MerCreMer</sup>; *R26*<sup>tdTomato</sup>;  
4 *Col2.3-GFP* mice showed no Cre activity without tamoxifen treatment. (n=3 mice from  
5 3 independent experiments)

6 (B) Representative confocal images of femur sections from *Kit*<sup>MerCreMer</sup>; *R26*<sup>tdTomato</sup>;  
7 *Col2.3-GFP* mice showed co-staining of endosteal Tomato<sup>+</sup> stromal cells by anti-TRAP  
8 antibody. (n=3 mice from 3 independent experiments)

9

10 **Figure S2. In vitro differentiation of c-kit<sup>+</sup> cell-derived CFU-Fs.**

11 (A) Representative confocal images of femur sections from *Kit*<sup>MerCreMer</sup>; *R26*<sup>tdTomato</sup> mice  
12 at E13.5. Mice were treated with tamoxifen at E12.5. Arrows indicated Tomato<sup>+</sup> cells at  
13 the growth cartilage. (n=3 mice from 3 independent experiments)

14 (B) Representative bright field image of colonies derived from Tomato<sup>+</sup> stromal cells  
15 of *Kit*<sup>MerCreMer</sup>; *R26*<sup>tdTomato</sup>; *Col2.3-GFP* mice. (n=3 mice from 3 independent experiments)

16 (C and D) *Kit*<sup>MerCreMer</sup>; *R26*<sup>tdTomato</sup>; *Col2.3-GFP* were tamoxifen-treated at E12.5/14.5  
17 and euthanized at 2 months of age. Tomato<sup>+</sup> stromal cells were sorted into culture for  
18 10 days before in vitro differentiation. Colonies were cultured in osteogenic medium  
19 for 7 days and then *Col2.3-GFP* expression was detected by fluorescent microscopy

20 (C). Colonies were cultured in adipogenic medium for 7 days, fixed by PFA and then  
21 stained by anti-perilipin antibody (D). (n=3 mice from 3 independent experiments)

22 (E) A schematic diagram showing the procedure of the ossicle formation assay.

1

2 **Figure S3. Conditional deletion of *Pparg* from fetal c-kit<sup>+</sup> cells reduced bone**  
3 **marrow adiposity.**

4 (A and B) Representative confocal images of femur sections from *Pparg*<sup>fl/fl</sup> and  
5 *Kit*<sup>MerCreMer</sup>; *Pparg*<sup>fl/fl</sup> mice that were stained by anti-perilipin antibody. (n=3 mice per  
6 genotype from 3 independent experiments)

7 (C) Quantification of perilipin<sup>+</sup> adipocyte numbers on femur sections from *Pparg*<sup>fl/fl</sup> and  
8 *Kit*<sup>MerCreMer</sup>; *Pparg*<sup>fl/fl</sup> mice. (n=3 mice per genotype from 3 independent experiments)

9 (A and B) Representative confocal images of femur sections from *Pparg*<sup>fl/fl</sup> and *Prx1-*  
10 *cre*; *Pparg*<sup>fl/fl</sup> mice that were stained by anti-perilipin antibody. (n=3 mice per genotype  
11 from 3 independent experiments)

12 (C) Quantification of perilipin<sup>+</sup> adipocyte numbers on femur sections from *Pparg*<sup>fl/fl</sup> and  
13 *Prx1-cre*; *Pparg*<sup>fl/fl</sup> mice. (n=3 mice per genotype from 3 independent experiments)

14

15 **Figure S4. *Lepr*-Cre efficiently targeted *Kitl*-expressing cells in young adult bone**  
16 **marrow stroma**

17 (A) Representative flow cytometry plots of enzymatically dissociated bone marrow  
18 cells from 2-month-old *Lepr*<sup>cre</sup>; *R26*<sup>tdTomato</sup>; *Kitl*<sup>GFP</sup> mice showed that most GFP<sup>+</sup> cells  
19 were Tomato<sup>+</sup> and vice versa. (n=3 mice from 3 independent experiments)

20 (B) Real-time PCR analyses of *Kitl* mRNA level (normalized to  $\beta$ -actin) of CD45<sup>+</sup>Ter119<sup>-</sup>  
21 CD31<sup>-</sup>PDGFR $\alpha$ <sup>+</sup> bone marrow stromal cells from 2-month-old *Kitl*<sup>fl/fl</sup> and *Lepr*<sup>cre</sup>; *Kitl*<sup>fl/fl</sup>  
22 mice. *Kitl* mRNA level in *Kitl*<sup>fl/fl</sup> mice was set as 1. (n=4 mice per genotype from 3

1 independent experiments)

2

3 **Figure S5. *Prx1*-Cre efficiently targeted *Kitl*-expressing cells in young adult bone**  
4 **marrow stroma**

5 (A) Representative flow cytometry plots of enzymatically dissociated bone marrow  
6 cells from 2-month-old *Prx1-cre; R26<sup>GtdTomato</sup>; Kitl<sup>GFP</sup>* mice showed that most GFP<sup>+</sup> cells  
7 were Tomato<sup>+</sup> and vice versa. (n=3 mice from 3 independent experiments)

8 (B) Real-time PCR analyses of *Kitl* mRNA level (normalized to  $\beta$ -actin) of CD45<sup>-</sup>Ter119<sup>-</sup>  
9 CD31<sup>-</sup>PDGFR $\alpha$ <sup>+</sup> bone marrow stromal cells from 2-month-old *Kitl<sup>fl/fl</sup>* and *Prx1-cre; Kitl<sup>fl/fl</sup>*  
10 mice. *Kitl* mRNA level in *Kitl<sup>fl/fl</sup>* mice was set as 1. (n=4 mice per genotype from 3  
11 independent experiments)

12 (D and E) Anti-TRAP staining of femur sections from *Kitl<sup>fl/fl</sup>* and *Prx1-cre; Kitl<sup>fl/fl</sup>* mice.  
13 (n=3 mice per genotype from 3 independent experiments)

**A***Kit<sup>MerCreMer</sup>; R26<sup>tdTomato</sup>; Col2.3-GFP*, 2-month-old, no tamoxifen, femur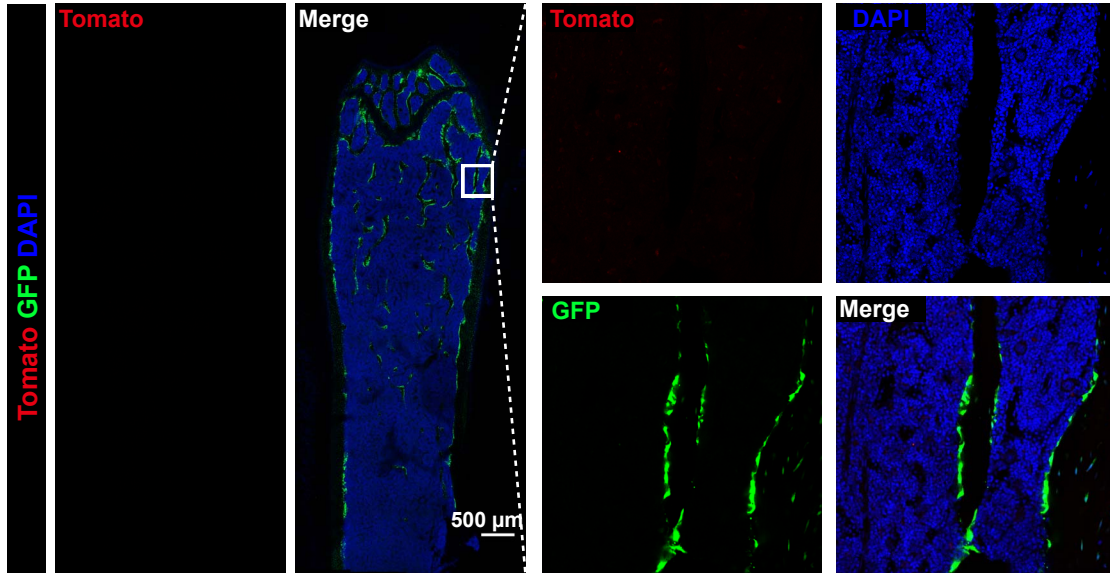**B***Kit<sup>MerCreMer</sup>; R26<sup>tdTomato</sup>; Col2.3-GFP*, 2-month-old, tamoxifen at P1-3, femur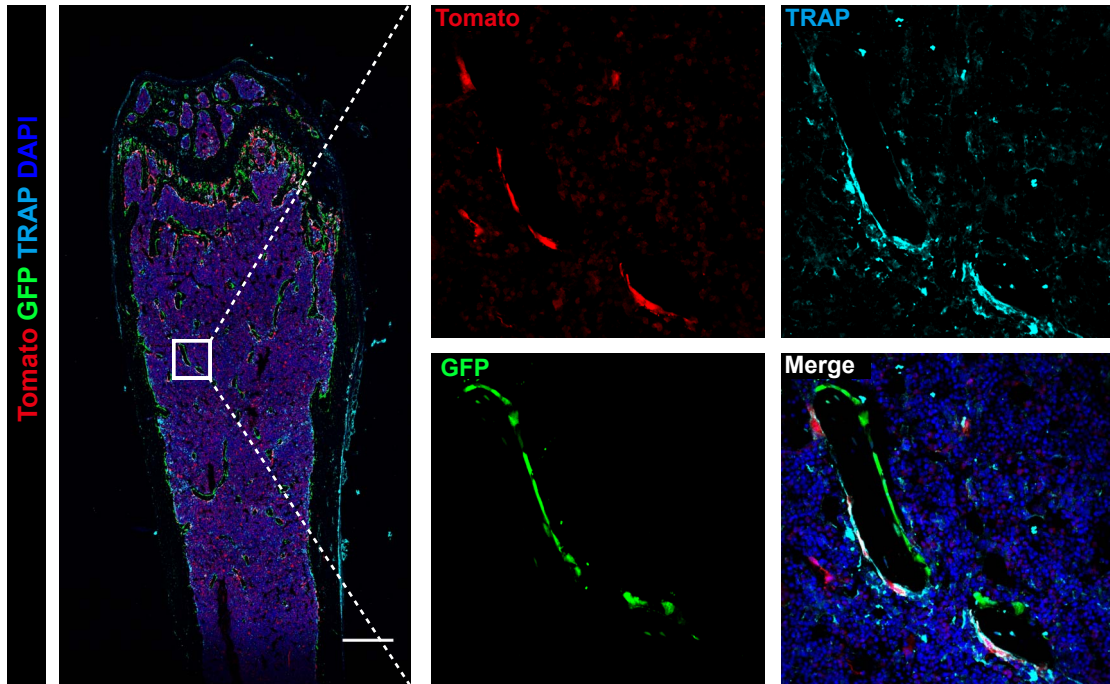**Figure S1**

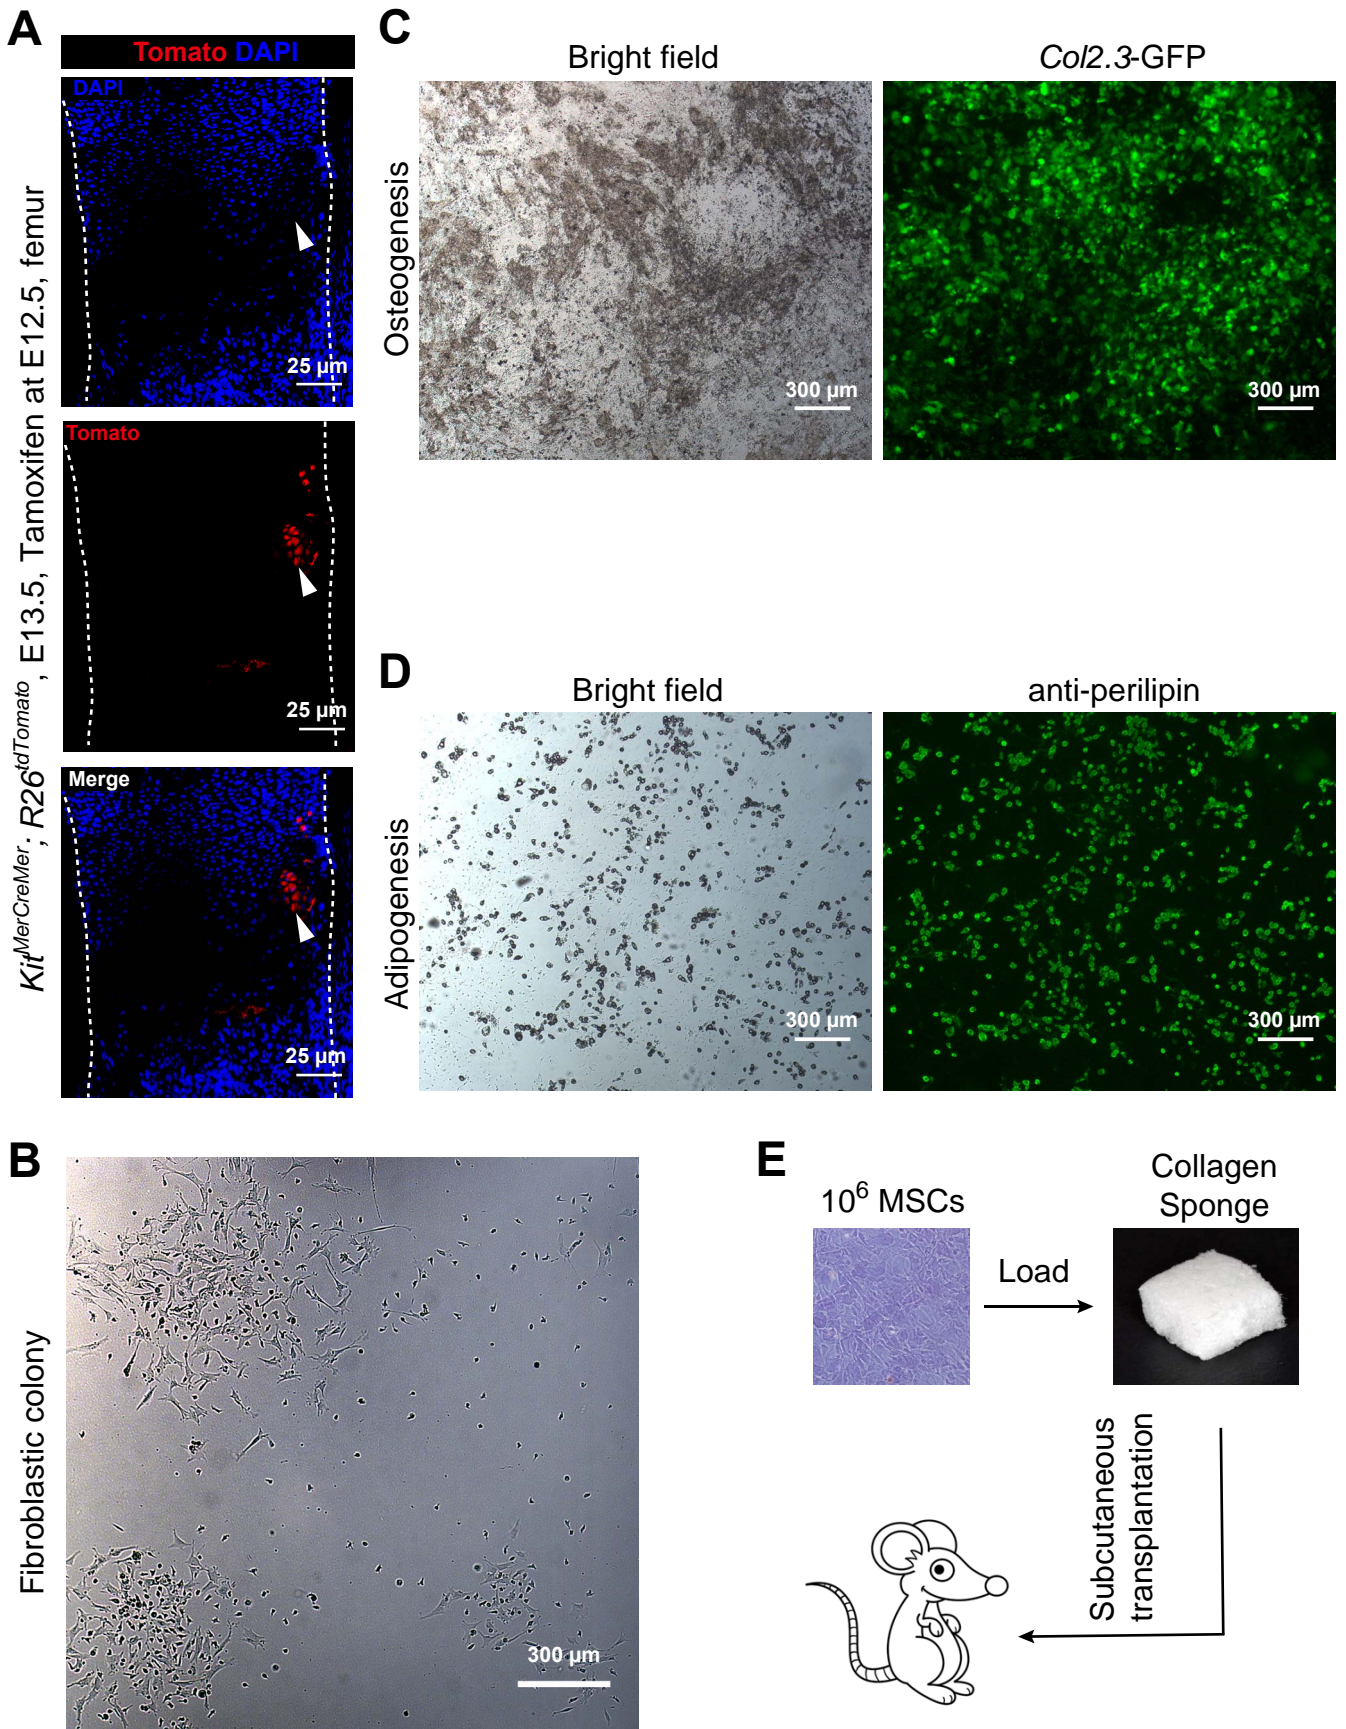

**Figure S2**

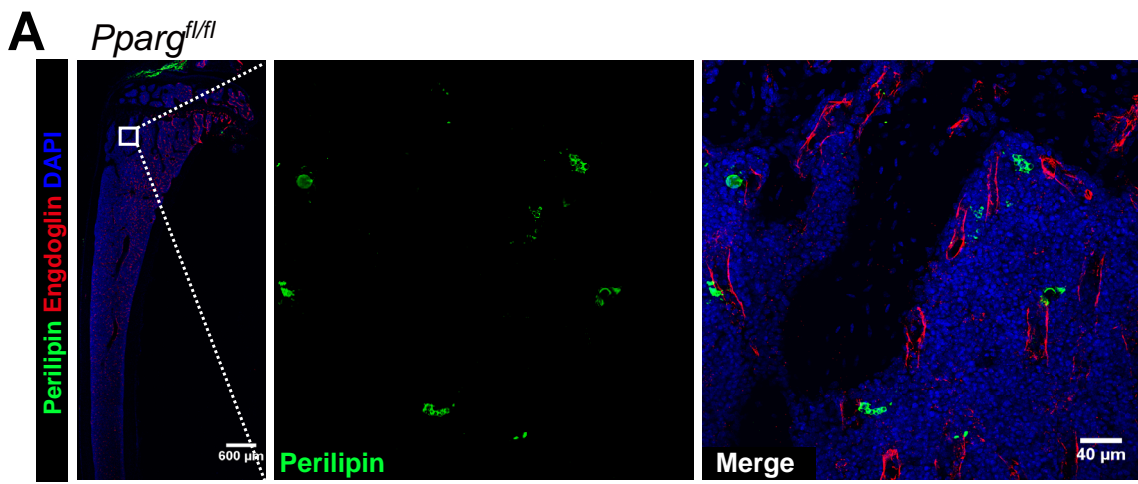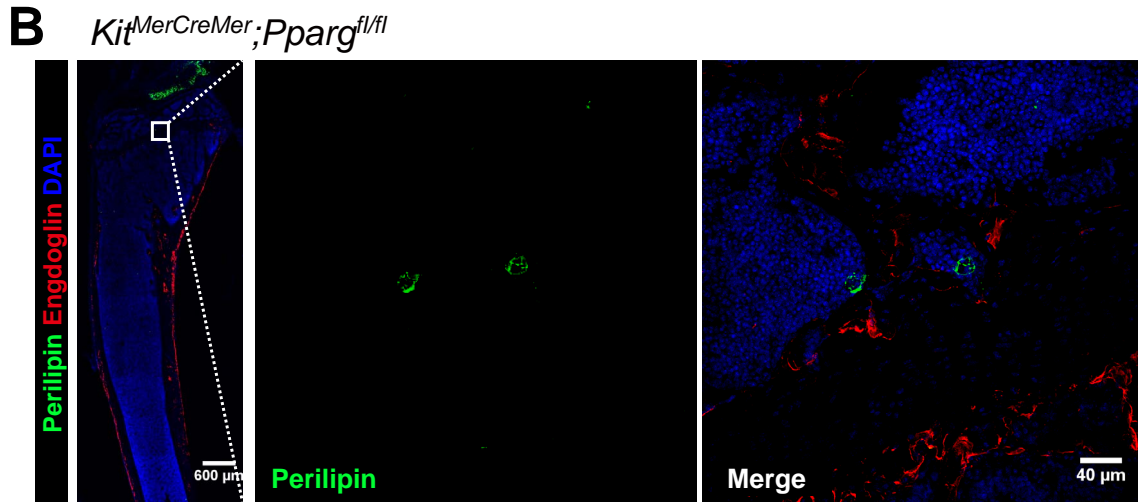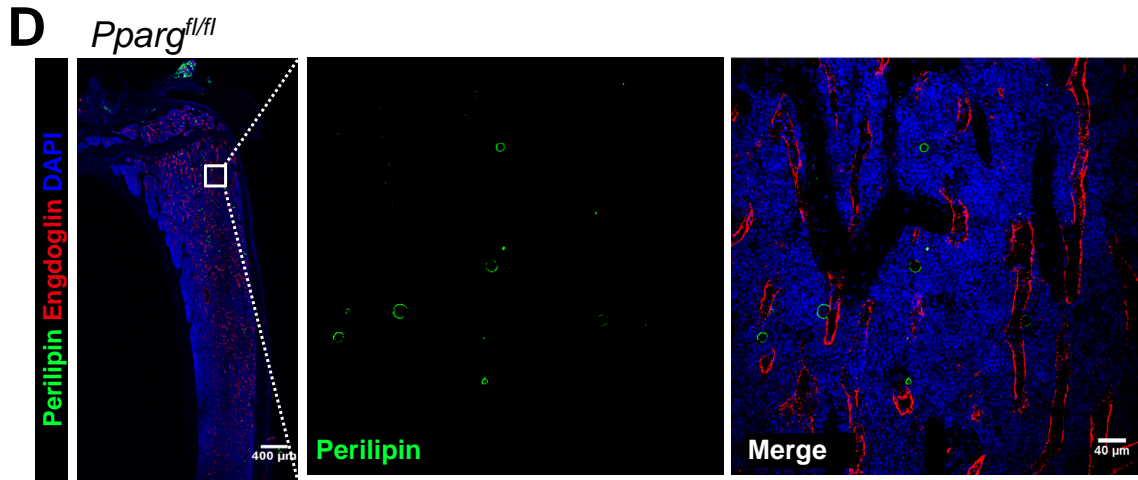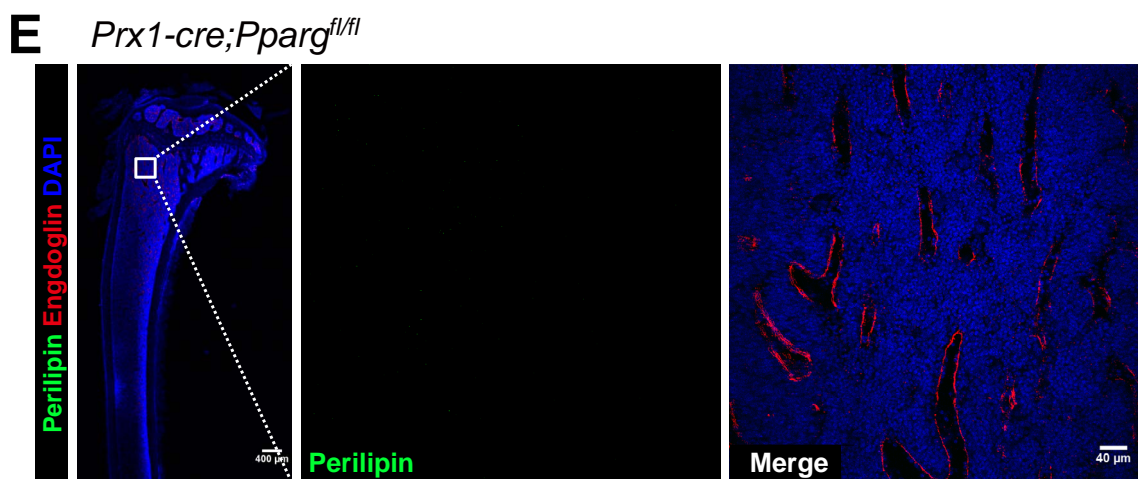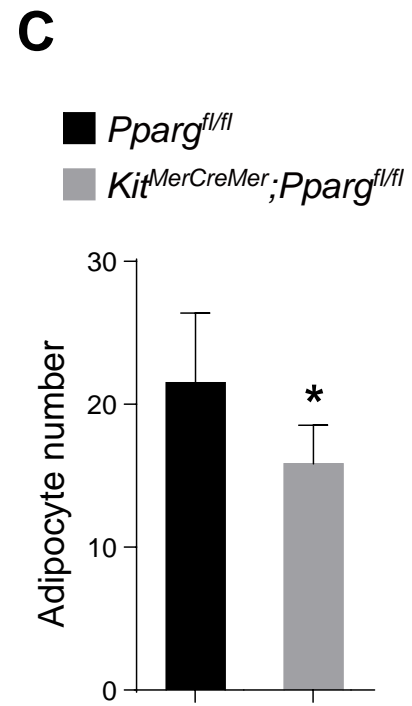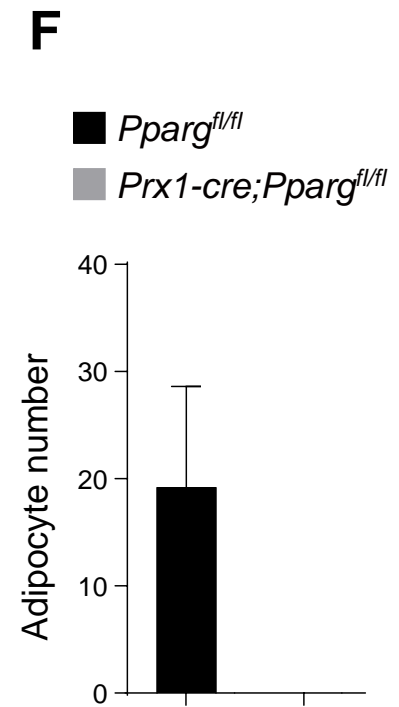

**Figure S3**



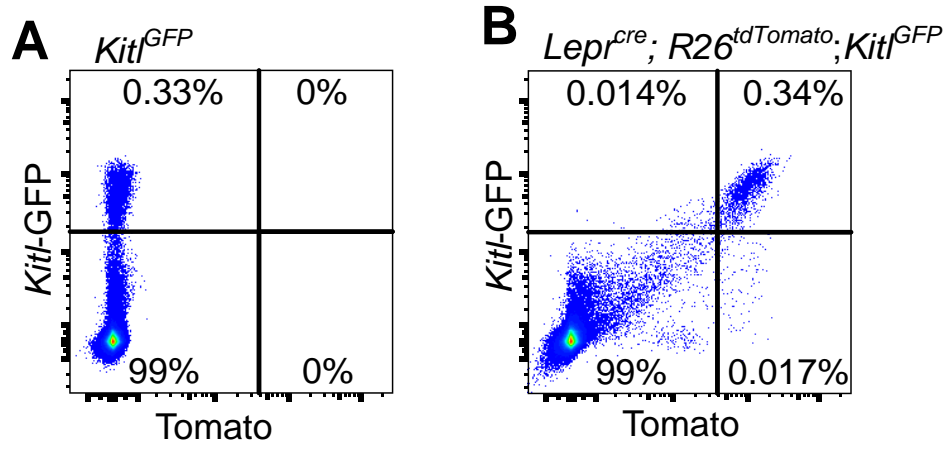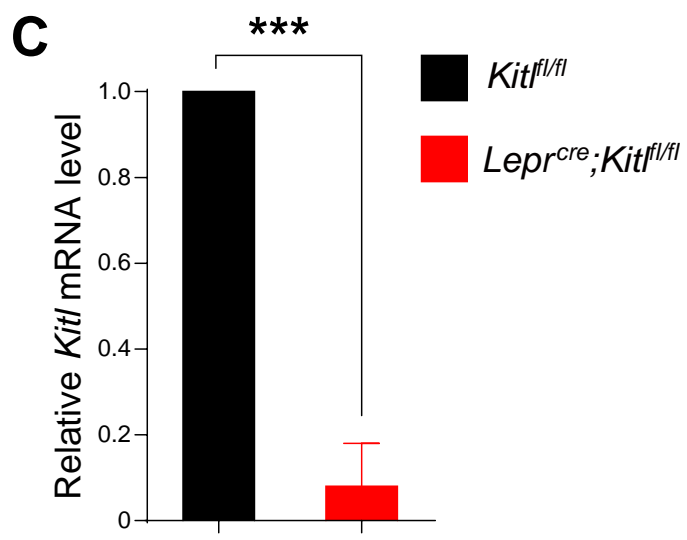

**Figure S4**

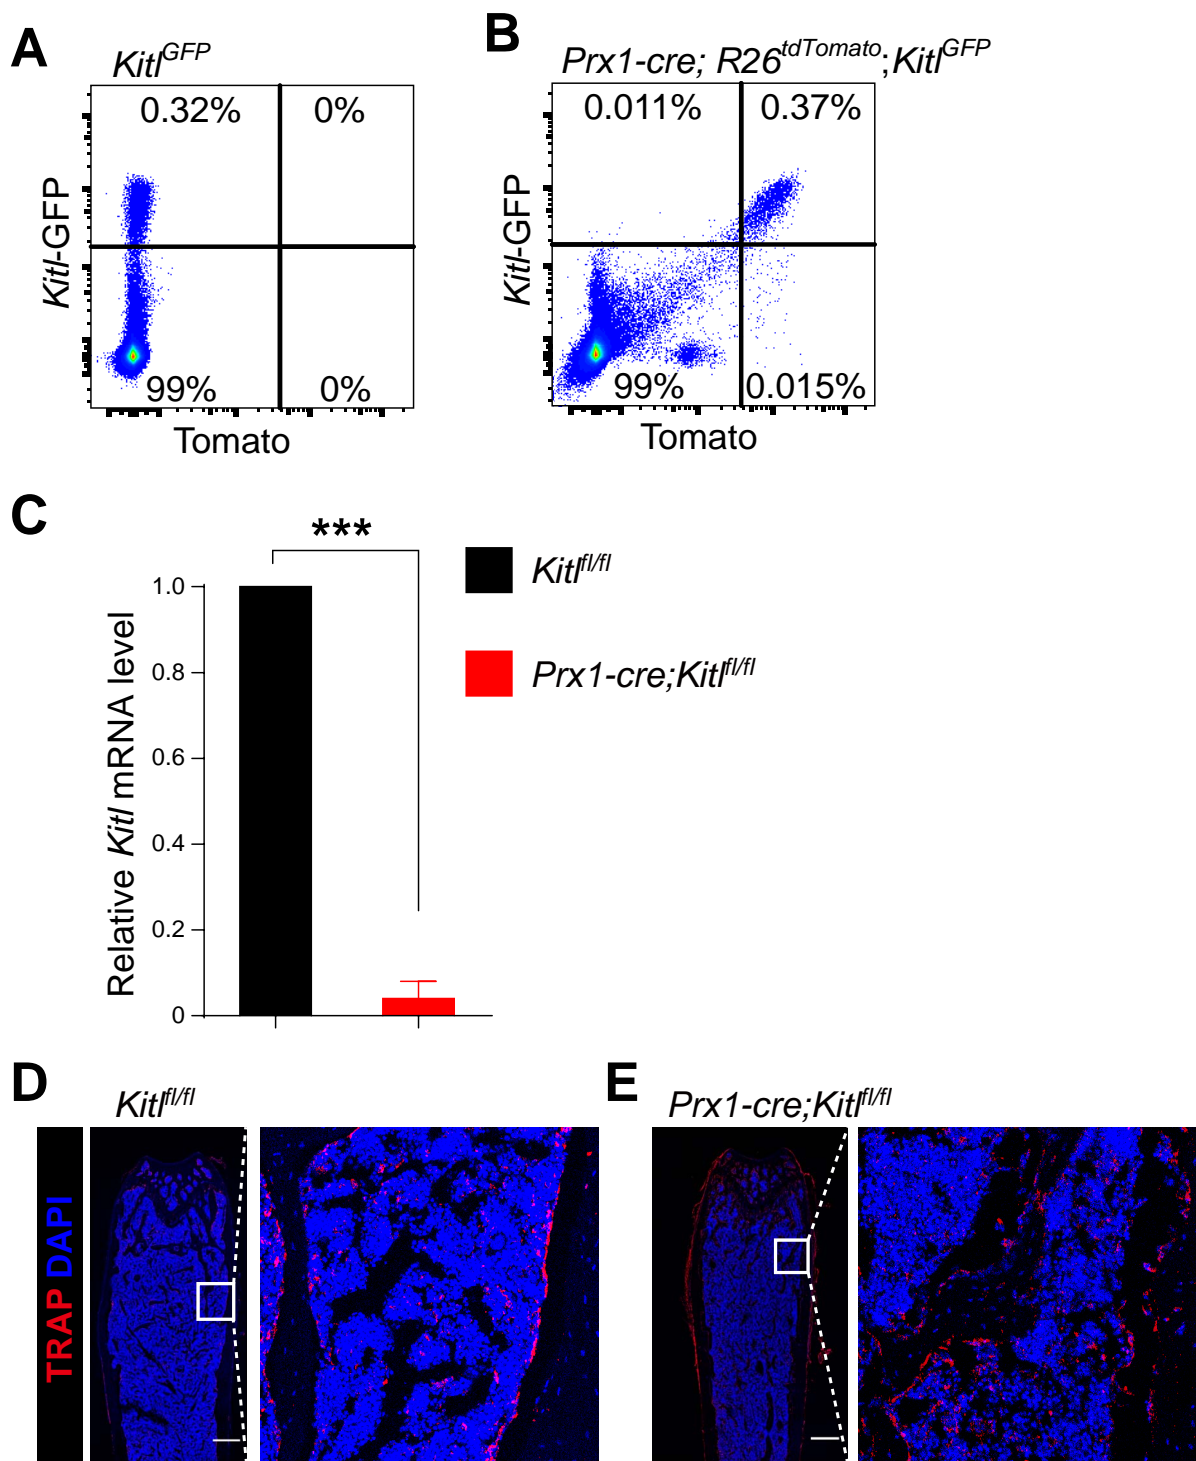

**Figure S5**
